# Cortical microinfarcts caused by single penetrating vessel occlusion lead to widespread reorganization across the entire brain in a CX3CR1 dependent manner

Alisa Lubart<sup>1</sup>, Amit Benbenishty<sup>2</sup>, Hagai Har-Gil, Hadas Laufer

*Sagol School of Neuroscience, Tel Aviv University*

Amos Gedalyahu

*School of Neurobiology, Biochemistry and Biophysics, Tel Aviv University, Israel*

Yaniv Assaf, Pablo Blinder<sup>3</sup>

*Sagol School of Neuroscience, Tel Aviv University, Israel*

*School of Neurobiology, Biochemistry and Biophysics, Tel Aviv University, Israel*

---

**Keywords:** Cortical microinfarct, Diffusion Tensor Imaging, Microglia/Macrophages, Single Vessel Occlusion, Targeted Photothrombotic, CX3CR1.

---

**Running title:** Cortical microinfarct have a brain-wide impact.

**Correspondence:** Please address correspondence to Pablo Blinder. Neurobiology, Biochemistry and Biophysics School, Tel Aviv University. email: pb@tauex.tau.ac.il

**Twitter account:** <https://twitter.com/PBNeuroVascLab>

**Figure color:** please print all figures in color

---

<sup>1</sup>These authors contributed equally to this work

<sup>2</sup>Current address: Biological Regulation, Weizmann Institute of Science, Israel

<sup>3</sup>Corresponding Author

## 1 **1. Introduction**

2 Dementia, and the associated cognitive impairment that goes along with it, have been attributed to  
3 a plethora of different mechanisms. As proper brain function is tightly coupled with the on-demand  
4 supply of oxygen and nutrients to active areas, perturbation to blood flow and the resulting neurovas-  
5 cular uncoupling play a crucial role in the ethology of these pathologies [1, 2, 3], even before the onset  
6 of the clinical symptoms [4]. Although research has traditionally focused on systemic and large-scale  
7 perturbations such as hypertension and stroke, cortical microinfarcts emerge nowadays as a novel and  
8 important risk-factor in humans [5, 6, 7], almost doubling the odds for developing dementia as reported  
9 in a recent meta-study [8]. Microinfarcts result from the occlusion of relatively small vessels and leave  
10 a well defined and restricted histological fingerprint with necrotic tissue extending into less than a cubic  
11 millimeter. Despite novel knowledge pointing to a larger proximal area beyond the ischemic core and  
12 penumbra [9], it is still largely unclear how such highly-localized damage can contribute to cognitive  
13 decline where affected areas and functions are distributed across different brain areas.

14 Experimentally-generated single penetrating vessel occlusions can be regarded as the minimally rele-  
15 vant vascular insult as those lead to the formation of cortical microinfarcts resembling in size an appear-  
16 ance the clinical findings [10, 9]. In turn, occlusions of either pial [11, 12] or capillary vessels [13] do not  
17 lead to an ischemic event given the redundancy present on these portions of the cortical vascular network  
18 [14, 12]. To assess the potential long-range impact of cortical microinfarcts, we combined here targeted  
19 photothrombotic occlusion of single penetrating cortical vessels with diffusion tensor imaging (DTI),  
20 tractography and histology. Cortical microinfarcts led to remodeling across large brain regions and to  
21 the formation of a microglia/macrophage migratory trail along the subcortical white matter tracts; pro-  
22 cesses that were dependent on the activity of the microglia/macrophage fractalkine receptor CX3CR1.  
23 Combined, we provide here evidence to link local microinfarcts with brain-wide remodeling pointing at  
24 microglia/macrophage motility and reactivity as mediators of this phenomena.

## 25 **2. Results**

### 26 *2.1. Microinfarcts results in brain-wide structural reorganization*

27 We first set to test whether a single cortical penetrating vessel occlusion could have an effect beyond  
28 the expected limits [9]. Since we wanted to capture morphological changes through time and over the  
29 entire brain, we turned to Diffusion-Tensor Imaging (DTI) which has been used to observe structural  
30 cerebral changes in human and small animals studies following stroke [15, 16]. Here, DTI allowed us  
31 to longitudinally track remodeling over time and compare it to a baseline conditions of each animal  
32 prior to the occlusion. Anesthetized adult mice underwent targeted photothrombotic occlusion of single  
33 penetrating-vessel (Figure 1A) which resulted in the formation of a cortical microinfarct (Figure 1B).  
34 We chose to perform the occlusion in animals implanted with a polished and reinforced window (PoRTs)  
35 as this particular preparation enabled imaging and induction of the photothrombotic occlusion while  
36 minimizing or completely avoiding inflammatory response [17, 18] which can bear potential confounding  
37 effects.

38 Nine wild type C57BL/J mice were scanned before micro-occlusion induction (baseline), and 1, 7,  
39 21 and 28 days following micro-occlusion (Figure 1C). T2-weighted imaging 1 day post micro-occlusion  
40 revealed a hyper-intense signal at the lesion site, indicating tissue damage and edema formation. This  
41 hyper-intense signal extended from the pial surface into the cortical gray matter, and in some mice reached  
42 the underlying white matter of the corpus callosum. The hyperintense signal was lower in the 1-week  
43 time point, indicating reduction in edema through time, while at 4 weeks a small hypointense signal was  
44 visible at the lesion site (Figure 1C, arrow), indicating gliosis formation ([19]).

45 Tissue remodeling was probed by measuring and analyzing two parameters obtained from DTI: mean  
46 diffusivity (MD) and fractional anisotropy (FA). MD measures the average magnitude of the molecular  
47 motion while FA measures its directionality [20]. Initially, we analyzed MD and FA changes over time  
48 using a region-based analysis of the infarct area of each mouse and the corresponding area in the con-  
49 tralateral hemisphere. As expected ([21, 22]) regional MD and FA values in the infarct area decreased

50 one day following occlusion and gradually increased thereafter (Supplementary Figure S1A i+ii) while  
51 in the exact same region on the contralateral hemisphere there were almost no changes following occlu-  
52 sion throughout time in both parameters (Supplementary Figure S1B i+ii). Looking beyond these area  
53 revealed extensive remodeling. A voxel-based repeated measure ANOVA (five time points), highlighted  
54 several clusters where a significant ( $p < 0.05$ , ANOVA) change in FA (Figure 1D, i) and MD (Figure 1D,  
55 ii) values occurred through time, before correction for multiple comparisons ([23]). Significant changes  
56 after correction for multiple comparisons ( $p < 0.05$ ) in regional mean diffusivity through time appeared  
57 in brain regions located several millimeters away from the occlusion site, including –among others– re-  
58 gions such as the contralateral somatosensory cortex (Figure 1Ei) and the contralateral fimbria of the  
59 hippocampus (Figure 1Eii). Similarly, both ipsi- and contralateral ventricles showed remodeling (Figure  
60 1Eiii). These results indicate that a microinfarcts lead to changes in tissue structure far from the local  
61 lesion site affecting areas across the entire brain.

62 *2.2. Occlusion of a single penetrating-vessel in the somatosensory cortex results in distant accumulation*  
63 *of FITC-dextran along subcortical white matter*

64 As part of the targeted-phototrombotic occlusion protocol, a 2000kDa dextran conjugated to fluores-  
65 cein was injected into the blood stream to visualize blood vessels, and measure flow and vessel diameter  
66 [11]. Accumulation of the dextran around the ischemic area is commonly observed [11, 24, 25, 26]. To  
67 our surprise, histological examination of brains of mice after their last DTI scan, 28 days following micro-  
68 occlusion induction, revealed accumulation of FITC-dextran well beyond the occlusion site, spreading  
69 along the sublesional white matter (Figure 2A) and to a lesser extent, over the pial meninges (Supple-  
70 mentary Figure S3). In what follows, we focused on the white matter phenomena which termed as trail.  
71 To this end, separate animals were induced with a single micro-occlusion and sacrificed at different time  
72 points. The trail spread over the subcortical axonal tracts, and could be clearly observed in sections  
73 anterior and posterior to the area of infarct. In fact, in about 15% of the cases it crossed to the contralat-  
74 eral hemisphere (Figure 2B). If the trail reflected some pathological process or remodeling of the white

75 matter, this could turn to be the missing link between local microinfarcts and their long range effects  
76 identified by DTI (Figure 1), prompting us to further explore this phenomena.

77 As BBB integrity is impaired in the core and penumbra areas ([27]), we hypothesized that the source  
78 of the FITC is nearby the occluded vessel as opposed to potentially damaged vessels along the white  
79 matter. To distinguish between these two alternatives, we used a red dextran (TexasRed, 70kDa) for  
80 visualizing blood vessels when performing the photothrombotic occlusion, and injected the green FITC-  
81 dextran either immediately after (i.e. day 0) or in subsequent days post occlusion (days 1,2,7 and 14).  
82 All animals were sacrificed 14 days following occlusion. We only observed the formation of a trail for mice  
83 injected at day 0. In all other time points, the FITC-dextran accumulated in the infarct site where the  
84 BBB was impaired ([26]), but was not detected along the white matter nor pial surface (Supplementary  
85 Figure S2), indicating that the FITC did not infiltrate from the periphery several days after the occlusion,  
86 but rather from the infarct site, either immediately after the clot formation or in the course of the following  
87 24 hours.

88 To investigate the temporal dynamics of the trail formation, mice were sacrificed at different time  
89 points (namely, 2, 4, 7, 10, 14 21 and 35 days) following targeted photothrombotic occlusion of either  
90 a vein or an artery of similar diameter ( $p=0.5887$ , Student's t) (Supplementary Figure S4). In the first  
91 week following occlusion, the FITC was visible mainly in the infarct area (days 2 and 4). However,  
92 from day 7 to 35 post-occlusion, a trail formed along the corpus callosum and to the internal capsule  
93 (Figure 2C). Fourteen days after the occlusion and later, the trail reached the contralateral hemisphere  
94 along the corpus callosum (Figure 2B). Trail length was positively correlated with time post-occlusion  
95 when considering all occluded vessel types together ( $r=0.47$ ,  $p=0.001$ ) or penetrating arteries ( $r=0.4$ ,  
96  $p=0.019$ ), but not veins alone ( $r=0.17$ ,  $p=0.56$ ) (Figure 2 D). Area and depth were not correlated with  
97 time following occlusion in neither vessel types (for area: arteries -  $r=0.155$ ,  $p=0.385$  and veins -  $r=0.25$ ,  
98  $p=0.41$ ; for depth: arteries -  $r=0.288$ ,  $p=0.103$  and veins -  $r=0.367$ ,  $p=0.217$ ). In addition, we detected  
99 a strong correlation between trail length and lesioned area cross section ( $r=0.69$ ,  $p<0.0001$ ) and depth

100 into the cortex ( $r=0.7$ ,  $p<0.0001$ ) (figure 2 E-F). Notably, occlusion of veins resulted in larger ( $p=0.0057$ ,  
101 Mann-Whitney) and deeper ( $p=0.0007$ , student's t-test) lesions (Figure 2E,F). Thirty-two percent of all  
102 lesions reached the white matter (15 of 46), while most of these were veins (9 of the 15).

### 103 *2.3. Microglia/macrophages migrate along the corpus callosum following penetrating vessel occlusion*

104 To further understand the nature of the observed trail, we performed a immuno-histological survey  
105 to identify cells that uptake the FITC-dextran. We chose the 14 days post-occlusion time point from the  
106 previous experiments for the analysis, as at this time a clear trail was observed along the corpus callosum  
107 in most animals. Consistent with previous reports ([28, 29, 30]), we observed microglia/macrophages and  
108 astrogliosis surrounding the lesion site. While microglia/macrophages occupied the infarct, astrocytes  
109 did not infiltrate the lesion core, forming a glial scar, as previously reported ([31]) (Supplementary Figure  
110 S5). Notably, microglia/macrophages in the penumbra were also FITC-positive, while astrocytes were  
111 not co-localized with FITC (Supplementary Figure S6).

112 Importantly, the vast majority of the FITC-dextran outside the infarct itself was found to be in-  
113 side cells, specifically microglia/macrophages (83% positive for both Iba1 and FITC). In line with this  
114 finding, 51% of the FITC-positive cells were also positive for CD45 which is preferentially expressed by  
115 macrophages and activated microglia (as opposed to Iba1 which is constitutively expressed). In contrast,  
116 FITC was rarely found inside astrocytes (2.6% positive for both GFAP and FITC). Doublecortin (DCX),  
117 a marker for newly formed neurons, was also not colocalized with the FITC-dextran (12%). Eight per-  
118 cent of the FITC-positive cells were oligodendrocytes (colocalized with Olig2). This last observation was  
119 replicated using transgenic mice expressing TdTomato under the control of the NG2 promoter, labeling  
120 pericytes and oligodendrocytes precursor cells [32] (OPCs; 6% positive for both TdTomato and FITC;  
121 Figure 5 A+B).

122 To verify if the trail is not formed due to passive dextran leakage but as a result of actual mi-  
123 croglia/macrophage spatial reorganization, we performed again single artery occlusion albeit in CX3CR1<sup>GFP/+</sup>  
124 mice, without labeling blood plasma with FITC-dextran. In the CX3CR1-GFP mice either one (heterozy-

125 gous) or two (homozygous) copies of the CX3CR1 allele are replaced with GFP in cells under control of  
126 the endogenous CX3CR1 locus (microglia, macrophages, dendritic cells and more). Arteries were labeled  
127 with Alexa fluor 633 hydrazide, a specific arterial marker [33] with good spectral separation from the  
128 GFP expressed under CX3CR1 [34] (Figure 5C left). A photothrombotic occlusion was induced, result-  
129 ing in a small infarct (Figure 5C right). In line with our previous experiments, fourteen days following  
130 occlusion of a single penetrating artery, a trail of CX3CR1+ cells formed along the corpus callosum. In  
131 general, expression levels of CX3CR1 are higher in activated microglia, leading to increased GFP expres-  
132 sion ([35, 36]). Therefore, to distinguish between migration and local activation, we measured GFP+ cell  
133 density in 5 regions of interest (ROIs) along the corpus callosum of CX3CR1<sup>GFP/+</sup> mice 14 days after  
134 photothrombotic occlusion, and compared it to control mice (Figure 5D). For each ROI, we computed  
135 the distance along the white matter tracts to the center of the infarct area (or an estimated center for  
136 corresponding location in the control group). We found a significant difference in the microglia distribu-  
137 tion between groups as a function of distance from the infarct ( $p < 0.01$  for the group difference,  $p < 0.001$   
138 for the distance effect and  $p < 0.01$  for the interaction between group and distance, mixed-effect general  
139 linear model). In control mice, resident microglia displayed uniform density throughout the different  
140 ROIs along the subcortical white matter. In contrast, following targeted occlusion, GFP+ cell density  
141 increased near the infarct area and decreased with distance from the infarct (Figure 5E). This result im-  
142 plies microglia/macrophages increased more pronouncedly their density along the trail rather than their  
143 GFP expression level. To verify that the GFP+ cells migrated to the corpus callosum from the lesion  
144 core and not from adjacent cortical areas, we measured GFP+ density in the cortex above the corpus  
145 callosum in five ROIs selected in similar locations 14 days following occlusion, in CX3CR1<sup>GFP/+</sup> mice  
146 compared to control animals, and found no difference between the groups ( $p > 0.05$ ) (Supplementary Fig-  
147 ure S8). Proliferation of resident microglia has been shown to occur in the surrounding of the ischemic  
148 core following photothrombosis [37]. Therefore, to distinguish between migration and proliferation of  
149 microglia we tested for the presence of proliferating microglia along the trail. CX3CR1<sup>GFP/+</sup> mice were

150 injected with BrdU, a nucleotide analog. While BrdU labeling was evident inside and adjacent to the  
151 infarct site, there was low double-labeling of GFP+/BrdU+ along the ipsilesional corpus callosum, and  
152 no double labeling in the contralesional hemisphere (Supplementary Figure S7). These results indicate  
153 that the trail consists of resident albeit migratory microglia/macrophages.

#### 154 *2.4. CX3CR1 pathway mediates trail length following arterial occlusion*

155 CX3CR1 signaling pathway plays a key role in microglia/macrophage migration and activation ([38,  
156 39]). To test whether trail formation is mediated by this pathway, we compared the impact of a single  
157 penetrating artery occlusion between CX3CR1<sup>GFP/GFP</sup> (i.e. CX3CR1 knocked-out) and heterozygous  
158 (HET) mice, fourteen days following occlusion (Figure 4A). Notably, the average diameter of occluded  
159 arteries was similar in both groups (p=0.788, Student's t-test) (Supplementary Figure S9A-B) and infarct  
160 areas did not differ between knock-out (KO) and heterozygous animals (p=0.387, Student's t-test) (Figure  
161 4B). Although GFP+ cells accumulated in the infarct core of both genotypes, the mean trail length  
162 was significantly higher in CX3CR1<sup>GFP/+</sup> compared to the CX3CR1<sup>GFP/GFP</sup> mice (p=0.0047, Mann-  
163 Whitney) (Figure 4C). Next, we tested the correlation between lesion area and trail length and infarct  
164 depth with trail length for both genotypes. Area (r=0.57, p=0.017) and depth (r=0.63, p=0.007) were  
165 positively correlated with trail length in heterozygous mice but not in KOs (r=0.42, p=0.21 and r=0.3,  
166 p=0.27, respectively) (Figure 4D-E).

#### 167 *2.5. CX3CR1 pathway mediates structural reorganization following arterial occlusion and determines the* 168 *impact on white matter tracts*

169 Given the differential response in trail length observed for the different genotypes, we looked for  
170 potential remodeling difference across the entire brain using longitudinal DTI imaging in a new set of  
171 experiments. A voxel-based mixed-design analysis between group (WT and CX3CR1-KO) and time (5  
172 DTI scans), revealed a significant (p<0.05) main effect for the group factor in several clusters throughout  
173 the brain, for MD (Figure 5A) and FA (Figure 5B) maps. The voxel based analysis also revealed signifi-



174 cant multi-regional interaction between group and time in MD values, indicating that in each genotype  
175 the occlusion had a different structural impact as a function of the time that has past from the occlu-  
176 sion (Figure 5C). The clusters were located in both the cortex and the white matter, including in the  
177 contralateral hemisphere (Figure 5D).

178 To study fiber integrity characteristics following arterial occlusion, we performed post-hoc tractogra-  
179 phy analysis with corpus callosum as seed region. FA values from the dorsal part of the corpus callosum  
180 (splenium) were extracted for each animal (Figure 6A). The mean FA value of each group was plotted  
181 throughout the length of the tract. FA values 28 days following occlusion were compared to pre-occlusion  
182 baseline. In wild type mice, FA values increased in the contralateral hemisphere, with no change in the  
183 ipsilesional hemisphere. In contrast,  $CX3CR1^{GFP/GFP}$  mice displayed the opposite behavior, as mean FA  
184 values increased in the ipsilesional hemisphere and did not change in the contralateral hemisphere (Figure  
185 6B). This result indicates that  $CX3CR1$  mediates the impact of arterial occlusion on fiber integrity, with  
186 distal effects in animals expressing  $CX3CR1$  compared to the local effects in the knock-out mice.

187 To visualize the microglia-myelin interaction we stained sections collected for the histological analy-  
188 ses experiments (14 days following occlusion) for myelin basic protein (MBP), and examined  $CX3CR1$   
189 (green) and myelin (red) co-localization in the corpus callosum. In control mice (i.e. no occlusion) of  
190 both heterozygous and KO mice - the myelin staining appeared intact, with myelin sheets across the  
191 corpus callosum with only few  $CX3CR1$  cells in the region. However, a single penetrating artery occlu-  
192 sion in  $CX3CR1^{GFP/+}$  mice resulted in aberrant myelin staining and increased number of GFP+ cells  
193 accumulated in demyelinated regions in a chain-like formation. In  $CX3CR1$ -KO mice this phenomenon  
194 was attenuated - less accumulation of GFP+ cells and the myelin appeared more intact compared to the  
195 occluded  $CX3CR1^{GFP/+}$  mice (Supplementary Figure S10).

### 196 3. Discussion

197 In the current study we report the previously unappreciated long-range structural impact of single  
198 cortical microinfarcts engendered by occlusion of a single penetrating vessel. Using diffusion tensor imaging  
199 (DTI), we show that such restricted occlusions and the resulting microinfarct lead to widespread structural  
200 changes in different brain regions, distant from the occluded vessel and the microinfarct, affecting both  
201 the ipsilesional and contralesional hemispheres (Figure 1). Moreover, we discovered the formation of a  
202 cellular migratory path along the subcortical axonal tracts that forms days to weeks after the vascular  
203 insult (Figure 2) and can cross to the contralateral hemisphere through the corpus callosum. The length  
204 of this migratory path was found to be dependent on time and size of the infarct (Figure 2). A histological  
205 survey allowed us to point at microglia/macrophages as main components of the migratory path (Figure  
206 5) and provide clear evidence that they migrated along the white matter tracts to form the observed  
207 spatial pattern. We further show that this migration was CX3CR1-dependent (Figure 4) and that this  
208 molecular pathway also mediates structural reorganization (Figure 5) and modulates axonal fiber integrity  
209 following the formation of a cortical microinfarct (Figure 6).

210 Past work has demonstrated that the histological signature left by cortical microinfarct (generated  
211 by the experimental occlusion of single penetrating vessels as done in this work) underestimated the  
212 volume of affected tissue. Summers and coworkers [9] elegantly showed that the affected volumes can be  
213 up to 12 times larger than the one observed with anti-NeuN staining or with different MRI modalities.  
214 The evidence we present here further emphasizes this notion, as we show that while occlusion of a  
215 single penetrating vessel results in a small infarct, it leads to structural organization in distant and  
216 noncontiguous areas beyond the infarct site and peri-lesion site, affecting also the contralateral hemisphere  
217 (Figure 1). Similar extensive remodeling cases have been reported, both in pre-clinical work and in the  
218 clinic, for conditions that involved much larger insults such as unilateral strokes [40, 16, 41] and traumatic  
219 brain injuries (TBI) [42, 43]. Here, clusters of voxels in different brain areas proximal and distal to the  
220 infarct penumbra showed significant changes in MD values as a response to the microinfarct induction. It

221 is well accepted that increased MD values point to reduction in tissue integrity, caused by neuronal death  
222 or cyst formation [44]. In turn, decreased MD values might suggest processes such as migration, increase  
223 in cell density, and plasticity [45]. We have observed a plethora of MD longitudinal changes associated  
224 with different clusters, with both increases and decreases compared to baseline (for e.g. Figure 5Di-iii).

225 In the current study we observed a dextran-trail that originated from the occlusion core and spread  
226 throughout the sublesional white matter. This finding was somewhat surprising, as other studies that  
227 used the exact same micro-occlusion model, including the same FITC-dextran, did not report such a  
228 phenomenon. We reason that this is due to the fact that histological analyses in these studies were  
229 performed at earlier time points following occlusion ([13, 25, 46]). Even when the pattern could have  
230 been observed, it went unnoticed. For example, Li and coworkers [19], used non targeted photothrombosis  
231 and studied the histological impact up to 14 days post stroke; their Figure 5, panel A6 (bottom) shows a  
232 clear Iba1-positive trail as reported in much more detail here. Indeed, we show that the trail is initially  
233 observed one week following occlusion and develops throughout time becoming more pronounced after 14  
234 days (Figure 2), even for smaller cortical infarcts originated by the photothrombotic occlusion of a single  
235 penetrating vessel.

236 Our results point to microglia/macrophages as the key cellular components of the trail (Figure 5).  
237 As we did not observe neither dextran leakage from the periphery (Supplementary Figure S2), nor pro-  
238 liferation along the white matter (Supplementary Figure S7), nor differences in microglia density near  
239 the white matter (Supplementary Figure S8), we conclude that microglia/macrophages migrate from the  
240 infarct area along the white matter tracts. Microglia are the primary immune effector cells in the brain  
241 ([47]). Following injury, a cascade of pro- and anti-inflammatory cytokines and chemokines are released  
242 in the ipsilesional, as well as in the contralesional regions ([48]), resulting in microglial proliferation and  
243 migration. In aging ([49]) multiple sclerosis (MS) ([50]) and TBI ([48]), microglia/macrophages were  
244 shown to migrate and to accumulate in the white matter, where they cleared myelin debris from injured  
245 axons and allowed remyelination. Accordingly, we found that the microglia accumulation along the white

246 matter was accompanied by myelin reduction in the heterozygous CX3CR1 mice but not in the knock-out  
247 (Supplementary Figure S10). Together, these observations emphasize the potential role of microglia to  
248 limit the detrimental impact of single and multiple microinfarcts.

249 We found that the microglial migration following micro-occlusion was fractalkine (FKN) CX3CR1  
250 axis dependent (Figure 4). While infarct size (i.e. area and depth) was similar in CX3CR1-KO and  
251 heterozygous animals, knock-out animals displayed shorter trails following occlusion of vessels with sim-  
252 ilar diameters. The FKN-CX3CR1 pathway underlies neuron-microglia communication in health and  
253 disease ([51]) and mediates microglial activation and migration ([38, 39]). This pathway is also key for  
254 microglial support of developing neurons and for synapse maturation and stability ([52]). In an MS model,  
255 CX3CR1-KO mice displayed reduced phagocytosis and microglial migration along the corpus callosum;  
256 resulting in inefficient clearance of myelin debris and defected remyelination ([50]). While we have not  
257 directly measured remyelination in the current study, lack of CX3CR1 resulted in altered reorganization  
258 patterns throughout time, as indicated by DTI measurements (Figure 5). DTI is sensitive to structural  
259 cellular changes pointing to degenerative processes, including astrogliosis, de- and remyelination, and  
260 microglial/macrophage activation ([53, 54]). In addition, tractography analysis of the splenium section  
261 of the corpus callosum revealed local increase in FA values in CX3CR1-KOs and the distal increase in FA  
262 values in WT mice, indicating CX3CR1-mediated impacts on fiber integrity following micro-occlusions.  
263 While the anatomical basis for increased FA values is unknown, it may be explained by increased post  
264 injury axonal sprouting, increased myelination, or gliosis ([55]). Notably, microglial activation along  
265 fiber tracts far from the infarct site was previously demonstrated using PET-MRI in stroke ([56]) and  
266 TBI ([57]) patients. In the current study we show that following single penetrating vessel occlusion  
267 microglia/macrophages migrate along the white matter tracts, accompanied by wide range structural  
268 reorganization, both of which were mediated by the fractalkine axis. In the current study we did not  
269 measure the functional impact of the microglial migration along the white matter tracts and of the ob-  
270 served reorganization patterns. However, taken together with the aforementioned studies regarding the

271 role of microglia and the fractalkine axis in myelin debris clearance, remyelination and repair ([50] [58]),  
272 we hypothesize that following micro-occlusion, the cell bodies in the cortex are injured followed by axonal  
273 Wallerian degeneration ([59, 60]). Microglia/macrophages are then activated and migrate to clear myelin  
274 debris, allowing remyelination and repair. In cases of multiple microinfarcts, microglia/macrophages may  
275 not be effective enough or sufficient for repairing the damage, or may be over-activated due to a chronic  
276 condition [61, 62], resulting in neurodegeneration and cognitive impairments.

277 Many reports describe evidence for ipsilesional reorganization post stroke or photothrombotic occlu-  
278 sion (e.g. [63, 64]), and some findings point to contralateral reorganization post stroke [65, 66]. Van Meer  
279 and colleagues [67] found that in the first days after unilateral stroke in rats, interhemispheric functional  
280 connectivity disappeared, but were partially restored in the next few weeks, along with improved sen-  
281 sorimotor function [67]. Functional alterations are often accompanied by structural reorganization [68];  
282 although in the current study we did not assess functional outcomes, the structural changes reported  
283 here might constitute the morphological basis for such post stroke functional changes. Moreover, since  
284 stroke results in diaschisis [69] (i.e. functional loss in an otherwise healthy brain region connected to an  
285 affected area) the microglia/macrophage migration described here could be a potential therapeutic target  
286 for preventing the development of such condition.

287 The growing evidence linking cortical microinfarcts with cognitive decline suggests that the tissue  
288 damage is not limited to the ischemic core and subcortical white matter (for a comprehensive review  
289 see [70]). Under this emerging concept, distant yet contiguous tissue, has been shown to be affected  
290 by microinfarcts [9]. The work we presented here radically redefine *distant* as encompassing both the  
291 ipsi- and contra-lesion hemispheres in a process that involves the likely degradation of axonal tracts.  
292 Moreover, we report here a new phenomenon associated with microinfarcts; namely the formation of a  
293 microglia/microphage migratory path, initiated at the microinfarct core which develops along the axonal  
294 mantle and reaches the contralateral hemisphere across the corpus callosum over a period of several  
295 weeks. Importantly, we showed that both the extent of remodeling and migration are modulated, at least

296 partially, by the fractalkine receptor CX3CR1 expression levels. This later finding opens the opportunity  
297 for pharmacologically manipulation of microglia/macrophages activation to delay the detrimental impact  
298 of cortical microinfarcts.

## 299 4. Methods and Materials

### 300 4.1. *Animals*

301 All studies were approved by the Tel Aviv University ethics committees for animal use and welfare and  
302 in full compliance with IACUC guidelines. Two to four month old C57BL/6J, B6.129P-Cx3cr1tm1Litt/J  
303 heterozygous (i.e. CX3CR1<sup>GFP/+</sup>) and homozygous (CX3CR1<sup>GFP/GFP</sup>) (The Jackson Laboratory, stock  
304 005582) and NG2-TdTomato male and female mice were used. The CX3CR1<sup>GFP/+</sup> mice were generated  
305 by crossing C57BL/6J with (CX3CR1<sup>GFP/GFP</sup>) mice. NG2-TdTomato mice were used in the colocal-  
306 ization experiment (Figure 5). For that purpose, NG2-CreER transgenic mice (The Jackson Laboratory,  
307 stock 008538; [71]) were crossed with Rosa26-tdTomato (Ai14) reporter line (Jackson Laboratories, stock  
308 007908). Four weeks old progeny received tamoxifen for 4 days, as described previously ([72]), to induce  
309 TdTomato fluorescent protein expression in NG2 cells. All animals were housed under standard vivarium  
310 conditions (22°C, 12h light/dark cycle, with ad libitum food and water). No animals were excluded  
311 from the experimental groups once assigned. Although no specific randomization scheme was used while  
312 allocating animals to each group, no selection criteria was implemented and animals were randomly picked  
313 from their cages to enter into the different cohorts.

### 314 4.2. *Two-photon imaging and photothrombotic occlusion*

315 For vascular imaging and photothrombotic occlusion of single penetrating vessels, a polished and rein-  
316 forced thin-skull (PoRTS) window was used, as previously described [18]. Briefly, Mice were anesthetized  
317 and maintained on 1.52% isoflurane in a 30/70 oxygen/N<sub>2</sub>O mixture, and body temperature was moni-  
318 tored and maintained at 37°C. Animals were fixed using a stereotaxic frame, and a 2.5mm<sup>2</sup> of the skull

319 was thinned to a width of 20-40 $\mu$ m with a high-speed manual drill (Osada, drill bit #5) over the right  
320 somatosensory cortex (center point at 2.5mm lateral and 2.5mm posterior to bregma). The skull was  
321 cooled after each thinning cycle using artificial cerebral spinal fluid (ACSF) and special care was given  
322 to avoid breaking of the skull and provoking inflammation. The thinned region was covered with #0  
323 thickness cover glass for optical access. A custom-made metal head frame was fixed to the contralateral  
324 skull using cyanoacrylate glue (Loctite 401) and dental cement (high-Q-bond, BJM labs) to enable head  
325 fixation during imaging. A 3D printed well was glued to the skull surrounding the window, to hold water  
326 while imaging with a water immersion lens. For cranial windows in MRI experiments, the metal head  
327 frame and plastic well were not used to avoid magnetic artifacts. Instead, these animals were fixed under  
328 the two-photon microscope using a stereotactic apparatus, and their skin was sutured over the window.  
329 Carprofen (0.05 mg/kg) was provided for analgesia. For two-photon imaging we used a modified micro-  
330 scope based on a Sutter MOM platform, (Sutter Inc) with a Leica 25X water immersion objective (NA  
331 0.95). Linescan data was acquired using MPScope ([73]) and raster images with Scanimage ([74]) soft-  
332 wares. To image blood vessels and determine the vessel type (artery or vein) mice were injected with 5%  
333 fluorescent-dextran (Table 1) dissolved in ACSF (25 $\mu$ l; retro-orbitally). C57BL/6J and NG2-TdTomato  
334 mice were injected with FITC-dextran (2000kDa) or Texas red (70kDa) and vessel type was determined  
335 by blood flow directionality using arbitrary linescans, as previously described ([75]). CX3CR1 mice were  
336 injected with Alexa Fluor 633 hydrazide (Invitrogen) for specific arterial labeling ([33]). For targeted  
337 single-vessel occlusion we used an approach previously described [24, 12, 76]. Mice were injected with  
338 Rose Bengal dissolved in saline (25 $\mu$ l; retro-orbitally) and a green CW laser (532 nm; 0.1-0.5mW; Beta  
339 Electronics, Irvine) was immediately directed for 30 seconds to the lumen of the targeted vessel (12 to  
340 25 $\mu$ m in diameter) through the imaging objective. We assured the vessel was completely occluded for at  
341 least 30 seconds later to ensure the occlusion was not transient. Control mice underwent an identical  
342 procedure, including cranial window preparation, but were either deprived of Rose Bengal administration  
343 or laser illumination.

Table 1: Fluorescent agents for blood labeling under Two-photon imaging. Description of agents used for all experiments involving vascular imaging under two-photon microscopy. Provided are the excitation wavelength used and the peak emission for each fluorophore.

| Fluorophore                                         | Excitation (nm) | Emission (nm) | Catalog number        |
|-----------------------------------------------------|-----------------|---------------|-----------------------|
| Fluorescein isothiocyanate (FITC) dextran (2000kDa) | 920             | 530 green     | Sigma-Aldrich FD2000S |
| Texas red dextran (2000kDa)                         | 920             | 615 red       | Nanocs DX2000-TR      |
| Alexa fluor 633 hydrazide                           | 810             | 633 far red   | Thermo-fisher a30634  |

#### 344 4.3. BrdU labeling

345 For the proliferation assay, CX3CR1 heterozygous (n=6) mice were injected seven consecutive days  
346 (starting 2h after the occlusion) with thymidine analog 5-bromo-2-deoxyuridine (BrdU; 50mg/kg, i.p.;  
347 Sigma-Aldrich, USA) as a marker for dividing cell. The mice were sacrificed seven days following the last  
348 injection (14 days following the occlusion).

#### 349 4.4. Tissue processing and immunostaining

350 Following euthanization (Pentobarbital overdose), mice were transcardially perfused with PBS-heparin  
351 followed by 4% paraformaldehyde (PFA). Brains were postfixed at 4C for 24h, then cryoprotected in  
352 30% sucrose for at least 48h. Coronal sections of 40µm were cut using freezing microtome (Leica) and  
353 processed as free-floating brain sections. The brain sections were blocked for 1h in blocking solution  
354 (10% goat serum, 0.3% Triton-X in PBS) at room temperature and then incubated overnight at 4C  
355 with the following primary antibodies in blocking solution: Rabbit anti-Iba1 (1:500; Wako Chemicals);  
356 Goat anti-DCX (1:200; sc-8066, Santa Cruz); Rabbit anti-NeuN (1:1000; MABN140, Millipore); Rat anti-  
357 GFAP (1:1000; Zyl30300, invitrogen); Mouse anti-MBP (1:500; SMI 99, BioLegend); Rat anti-CD45



358 (1:100, 550539, BD Bioscience); Rabbit anti-Olig2 (1:1000;AB9610, Millipore). For negative control, the  
359 primary antibodies were omitted and sections were incubated in blocking solution. The sections were  
360 incubated for 2h at room temperature with corresponding secondary antibodies: goat anti-rabbit 647  
361 (1:1000; Invitrogen); Goat anti-mouse 647 (1:1000; Invitrogen); Goat anti-rat 647 (1:1000; Invitrogen);  
362 Donkey anti-goat 647 (1:1000; Invitrogen) in blocking solution, followed by DAPI (1:1000; 0215757405,  
363 MPbio) for nuclei visualization. To double stain with BrdU, before blocking, sections were incubated in  
364 2M HCl for 20 minutes at room temp followed by neutralization in 0.1mol/L borate buffer and vigorous  
365 rinsing in PBS. The BrdU staining was performed with rat anti-BrdU (1:200, Abcam, Cambridge, UK).  
366 Fluorescence was detected with a Zeiss V12 fluorescent binocular (Zeiss, Germany) for entire coronal  
367 sections, and with Leica SP8 confocal microscope (SP8, Leica) for high resolution images using Leica  
368 Microscope Imaging Software. In order to characterize the identity of the cells that co-localized with  
369 FITC-dextran along the white matter, we counted the percent of cells on the trail that were double  
370 positive for FITC and the tested antibody. The absolute number of FITC-dextran labeled cells was  
371 counted in several fields of view along the corpus callosum using ImageJ software. Data represent the  
372 percentage of the cells that colocalized with FITC for each marker. All imaging and analysis parameters  
373 were kept constant, automated image processing and file naming was used as blinding approach.

#### 374 *4.5. Measurement of Infarct Area*

375 For infarct area measurement, brains from perfusion-fixed animals were sectioned into 40m coronal  
376 sections and stained for neuronal nuclei (NeuN). The central slice of the infarct was collected and imaged  
377 with Zeiss V12 fluorescent binocular (Zeiss, Germany). Infarct area of each slice was manually delineated  
378 using ImageJ software (NIH). Infarct area was calculated by measuring the area devoid of NeuN staining.  
379 For each animal the section with the largest infarct area was chosen.

| Antigen | Host   | Primary                          | Secondary        |
|---------|--------|----------------------------------|------------------|
| NeuN    | Rabbit | 1:1000 MABN140, Millipore        | Goat anti-rabbit |
| DCX     | Goat   | 1:1000; ab18723, Abcam           | Donkey anti-goat |
| Iba1    | Rabbit | 1:500; 019-19741, Wako Chemicals | Goat anti-rabbit |
| GFAP    | Rat    | 1:1000; Zy130300, invitrogen     | Donkey anti-rat  |
| CD45    | Rat    | 1:100, 550539, BD Bioscience     | Donkey anti-rat  |
| MBP     | Mouse  | 1:500; SMI 99, BioLegend         | Goat anti-mouse  |
| BrdU    | Rat    | 1:200, ab6326, Abcam             | Donkey anti-rat  |
| Olig2   | Rabbit | 1:1000; AB9610, Millipore        | Goat anti-rabbit |

Table 2: Antibodies used for staining. Description of antibodies used for all immunohistochemistry stainings.

#### 380 4.6. Measurement of Infarct depth

381 Infarct depth was calculated relatively to the cortex thickness in the area of infarct. The perpendicular  
382 distance from the pial surface to the upper border of the subcortical white matter was measured as total  
383 cortical thickness. Infarct depth was measured similarly, from the pial surface to the lower border of the  
384 infarct based on NeuN staining. Relative depth was calculated as the ratio between *infarct depth* and  
385 *cortical depth* (Figure 2 F). Based on this definition, if the infarct spanned the entire cortex and reached  
386 the white matter, the relative depth was 1.

387 *4.7. Measurement of trail length*

388 To quantify the trail length, the distance of positive FITC-dextran staining (in C57BL/J6 mice) or  
389 GFP (in CX3CR1 mice) was measured along the corpus callosum of the central infarct section. End  
390 points of the trails were manually determined along the corpus callosum using ImageJ software (NIH).

391 *4.8. CX3CR1 density measurement along the corpus callosum*

392 To quantify microglia/macrophage density along or above the corpus callosum in CX3CR1 mice, we  
393 acquired whole brain coronal images using an Olympus slide scanner (Olympus IX83) in X20 magnifica-  
394 tion. To analyze these images, we designed an interactive Matlab GUI to mark the following components:  
395 the outline of the infarct area, the corpus callosum and five regions of interest (ROIs) along it. ROIs  
396 were selected as follows: two regions in the ipsilesional hemisphere, one in the midline and two in the  
397 contralesional hemisphere (Figure 5E). For contralateral hemisphere of photothrombotic occluded mice,  
398 the ROIs were selected in the approximate mirror regions of the ipsilesional ROIs. Similarly, the five  
399 ROIs for the density measurements near the corpus callosum were marked on the cortex just above the  
400 corpus callosum (Figure 5-Supplementary Figure S8). For control mice, cell density was assessed in the  
401 equivalent regions to the treated mice. For each of the marked ROIs, an auto-thresholding adaptive pro-  
402 cedure was performed on the GFP channel to obtain a binary mask. Next, to remove thin cell processes  
403 and noise (in the form of smaller than cell soma binary blobs), the masks were initially eroded and a size  
404 restriction filter was subsequently applied. The specific filter parameters (erosion filter type and size and  
405 area threshold min and max values) are the only free parameters in the process and were chosen upon  
406 visual inspection of a sub set of images; once those were set they were used for all remaining images. The  
407 outcome of this process is an estimation of GFP densities in each ROI and the distance along the corpus  
408 callosum to the center of the infarct (projected to the corpus callosum). Data from several coronal slices  
409 (2-4) surrounding the infarct of each mouse brain were obtained from four-six mice of CX3CR1<sup>GFP/+</sup>  
410 occluded or control animals.

#### 411 4.9. Diffusion tensor imaging (DTI)

412 MRI scans were performed on a 7-Tesla MRI scanner (Bruker, Karlsruhe, Germany) with a 30-cm  
413 bore and a gradient strength of up to 400 mT/m. Volume coil for excitation and a mice quadrature  
414 coil for acquisition were used. Anesthesia was induced with 4% isoflurane (Vetmarket Ltd., Israel) and  
415 maintained with 12% isoflurane in 100% oxygen at a flow rate of 0.3-0.5 L/h. The respiratory rate was  
416 monitored throughout the entire experiment. The body temperature was monitored and maintained at  
417 37C using a feedback system of circulating water. Wild type (n=9) and CX3CR1-KO (n=8) mice with  
418 MRI compatible thin skull windows were imaged before occlusion (i.e. baseline) and longitudinally at 1,  
419 7, 21 and 28 days following micro-occlusion induction.

420 MRI protocol consisted of T2-weighted scans and diffusion tensor imaging (DTI). T2-weighted images  
421 were acquired with the following parameters: a MSME T2-weighted sequence allowed the acquisition of  
422 contiguous horizontal slices, which covered the whole mouse brain volume. Time of Repetition (TR)  
423 / Time to Echo (TE) = 8115/14ms, FOV of 1.81.8cm<sup>2</sup>, matrix size of 192160, resulting in an in-plane  
424 resolution of 98118m<sup>2</sup>. The DTI images were acquired with the following parameters: Fast low-angle  
425 shot (FLASH),  $\frac{TR}{TE} = \frac{9510}{18.6}$ ms,  $\Delta/\lambda = 10/4$  ms, 32 non-collinear gradient directions with a single b-value  
426 at 1307 s/mm<sup>2</sup> and an image of b-value of 0 s/mm<sup>2</sup> (referred to as b0 images). FOV of 1.89 x 1.89  
427 cm<sup>2</sup>, matrix size of 90 x 90 x 90 resulting in an in-plane resolution of 21m<sup>3</sup>. For both MRI protocols, 38  
428 contiguous horizontal slices, 0.21mm thick, were collected. To improve signal to noise ratio (SNR), and  
429 compensate for head motion due to animals breathing, DTI acquisition time was 17 min, and the entire  
430 MRI protocol lasted 35 minutes for each session.

#### 431 4.10. DTI analysis

432 MRI data was analyzed using ExploreDTI software ([77]). Prior to DTI calculation, the following  
433 pre-processing steps were performed: anisotropic smoothing, bias correction, skull stripping and regular-  
434 ization. DTI was then calculated and corrected for head motion and EPI distortions. Maps of diffusion  
435 weighted images (DWI), mean DWI and B-matrix data were exported. For voxel-based and region based

436 analysis, mean diffusivity (MD) and fractional anisotropy (FA) were exported. Scans of all time points  
437 for each mouse were normalized into a standard space, an averaged FA image of 16 baseline scans, using a  
438 12-parameter affine non-linear transformation in SPM8 (UCL, London). Following normalization, images  
439 were smoothed with a 0.4 mm Gaussian kernel.

#### 440 *4.11. Tractography analysis*

441 To observe white matter reorganization following microinfarct, tractography procedure, which enables  
442 reconstruction of white matter fasciculi ([78]), was performed using ExploreDTI software ([77]). The  
443 dorsal part of the corpus callosum (splenium), that is located beneath the occlusion site, was used as seed  
444 region. Our fiber tracking parameters were 0.2X 0.2 X 0.5 mm<sup>3</sup> seed point resolution, 0.16mm step size  
445 and 300 angular threshold. The length of the fibers was transferred to mutual dimensions of total length  
446 of 100 sections, where the midline was at section fifty. FA values of each group, for every time point at  
447 each section, were averaged.

#### 448 *4.12. Statistical analysis*

449 Statistical analyses were performed with MATLAB (MathWorks) or Prism (Graphpad) softwares.  
450 Linear regression was applied for analyzing correlations between trail length and time post occlusion,  
451 infarct area and relative depth. Gaussian based statistics (unpaired Student's t-test) was applied, unless  
452 the assumptions were not met, there we used the nonparametric Mann-Whitney test. Data presented  
453 as meanSEM, n.s = not significant. In figure 5 (E) Mixed-effect General Linear Model (GLM) was used  
454 for GFP density calculation with group and distance from cyst as the independent variables. The model  
455 contained terms for the *intercept*, *group* (sham, occlusion), *distance* from infarct center (measured along  
456 white matter tract) and interaction between *group* and *distance*. Analysis was performed in Matlab using  
457 the `fitlme` function from the Statistical toolbox. In 1 (D-E), a voxel-based repeated measures ANOVA  
458 was performed within the WT group, with 5 time points as a within subject factor, to reveal tissue  
459 changes through time. One mouse was excluded from analysis due to extremely enlarged ventricles and

460 general ill appearance. In figures 5 and 6, a voxel-based repeated measures ANOVA with main effects  
461 between groups (WT and KO) and within time (5 time point) and interaction (group vs. time point) was  
462 obtained as statistical parametric maps, followed by multiple comparison correction (FDR). A value of  
463  $p < 0.05$  was considered statistically significant. For illustration purposes we show the clusters both before  
464 and after FDR correction. The parametric maps are superimposed on an averaged FA map of baseline  
465 scan of all mice. For the tractography analysis, ANOVA was performed on the average FA value of the  
466 region (ipsilesional (1-49) and contralesional (51-100) sections), between two time points (baseline and 4  
467 weeks after the occlusion). Tukey post-hoc analysis on each section was performed to find the sections  
468 in which there was a significant difference between the means of the two time points. The specific test  
469 can be found in the results section.

## 470 **5. Acknowledgments**

471 This research was funded by the FP7-CIG Marie Curie Action to PB (project 618251); PB would  
472 also like to thank the support from the Israeli Science Foundation (1019/15) and the Leducq Foundation  
473 (FDNLEDQ-15CVD-02). AL thanks the Fondation Judaism Français for doctoral scholarship support.  
474 AB is grateful to Dante family for the award of doctoral fellowship. The authors thanks Amos Gedalyahu  
475 for comments on earlier version of the manuscript.

## 476 **6. Author Contribution**

477 Conceptualization, AL, AB and PB. Methodology, AL, AB, YA and PB, Software HH and PB.  
478 Investigation, AL, AB, HH and HL. Resources, PB. Writing original draft, AL, AB and PB. Writing  
479 Review & Editing AL, AB, YA and PB. Visualization, AL, AB, YA and PB. Supervision YA and PB.

## 480 **7. Competing interests**

481 The authors report no competing interests.

## 482 References

- 483 [1] C. Iadecola, L. Park, C. Capone, Threats to the Mind: Aging, Amyloid, and Hypertension, *Stroke*  
484 40 (2009) S40–S44.
- 485 [2] P. B. Gorelick, A. Scuteri, S. E. Black, C. Decarli, S. M. Greenberg, C. Iadecola, L. J. Launer,  
486 S. Laurent, O. L. Lopez, D. Nyenhuis, R. C. Petersen, J. A. Schneider, C. Tzourio, D. K. Arnett,  
487 D. A. Bennett, H. C. Chui, R. T. Higashida, R. Lindquist, P. M. Nilsson, G. C. Roman, F. W. Sellke,  
488 S. Seshadri, American Heart Association Stroke Council, Council on Epidemiology and Prevention,  
489 Council on Cardiovascular Nursing, Council on Cardiovascular Radiology and Intervention, and  
490 Council on Cardiovascular Surgery and Anesthesia, Vascular contributions to cognitive impairment  
491 and dementia: a statement for healthcare professionals from the american heart association/american  
492 stroke association., *Stroke; a journal of cerebral circulation* 42 (2011) 2672–713.
- 493 [3] K. Kisler, A. R. Nelson, A. Montagne, B. V. Zlokovic, Cerebral blood flow regulation and neurovas-  
494 cular dysfunction in Alzheimer disease, *Nature Reviews Neuroscience* 18 (2017) 419–434.
- 495 [4] B. DeStrooper, E. Karran, The Cellular Phase of Alzheimer’s Disease, *Cell* 164 (2016) 603–615.
- 496 [5] S. van Rooden, J. D. C. Goos, A. M. van Opstal, M. J. Versluis, A. G. Webb, G. J. Blauw, W. M.  
497 van der Flier, P. Scheltens, F. Barkhof, M. A. van Buchem, J. van der Grond, Increased Number of  
498 Microinfarcts in Alzheimer Disease at 7-T MR Imaging., *Radiology* 270 (2014) 205–211.
- 499 [6] S. J. van Veluw, J. J. M. Zwanenburg, J. Engelen-Lee, W. G. M. Spliet, J. Hendrikse, P. R. Luijten,  
500 G. J. Biessels, In vivo detection of cerebral cortical microinfarcts with high-resolution 7T MRI.,  
501 *Journal of cerebral blood flow and metabolism : official journal of the International Society of*  
502 *Cerebral Blood Flow and Metabolism* 33 (2013) 322–9.
- 503 [7] M. R. Raman, G. M. Preboske, S. A. Przybelski, J. L. Gunter, M. L. Senjem, P. Vemuri, M. C.  
504 Murphy, M. E. Murray, B. F. Boeve, D. S. Knopman, R. C. Petersen, J. E. Parisi, D. W. Dickson,

- 505 C. R. Jack, K. Kantarci, K. Kantarci, Antemortem MRI findings associated with microinfarcts at  
506 autopsy., *Neurology* 82 (2014) 1951–8.
- 507 [8] E. E. Smith, J. A. Schneider, J. M. Wardlaw, S. M. Greenberg, Cerebral microinfarcts: The invisible  
508 lesions, *The Lancet Neurology* 11 (2012) 272–282.
- 509 [9] P. M. Summers, D. A. Hartmann, E. S. Hui, X. Nie, R. L. Deardorff, E. T. McKinnon, J. A. Helpert,  
510 J. H. Jensen, A. Y. Shih, Functional deficits induced by cortical microinfarcts, *Journal of Cerebral*  
511 *Blood Flow & Metabolism* (2017) 0271678X1668557.
- 512 [10] N. Nishimura, C. B. Schaffer, Big Effects From Tiny Vessels : Imaging the Impact of Microvascular  
513 Clots and Hemorrhages on the Brain, *Stroke* (2013).
- 514 [11] N. Nishimura, C. B. Schaffer, B. Friedman, P. S. Tsai, P. D. Lyden, D. Kleinfeld, Targeted insult  
515 to subsurface cortical blood vessels using ultrashort laser pulses: three models of stroke., *Nature*  
516 *methods* 3 (2006) 99–108.
- 517 [12] P. Blinder, A. Y. Shih, C. Rafie, D. Kleinfeld, Topological basis for the robust distribution of blood  
518 to rodent neocortex., *Proceedings of the National Academy of Sciences of the United States of*  
519 *America* 107 (2010) 12670–5.
- 520 [13] N. Nishimura, C. B. Schaffer, B. Friedman, P. D. Lyden, D. Kleinfeld, Penetrating arterioles are a  
521 bottleneck in the perfusion of neocortex., *Proceedings of the National Academy of Sciences of the*  
522 *United States of America* 104 (2007) 365–70.
- 523 [14] P. Blinder, P. S. Tsai, J. P. Kaufhold, P. M. Knutsen, H. Suhl, D. Kleinfeld, The cortical angiome:  
524 an interconnected vascular network with noncolumnar patterns of blood flow., *Nature neuroscience*  
525 16 (2013) 889–97.
- 526 [15] R. M. Dijkhuizen, K. van der Marel, W. M. Otte, E. I. Hoff, J. P. van der Zijden, A. van der Toorn,



- 527 M. P. A. van Meer, Functional MRI and diffusion tensor imaging of brain reorganization after  
528 experimental stroke., *Translational stroke research* 3 (2012) 36–43.
- 529 [16] C. H. Sotak, The role of diffusion tensor imaging in the evaluation of ischemic brain injury - a  
530 review, *NMR in Biomedicine* 15 (2002) 561–569.
- 531 [17] H.-T. Xu, F. Pan, G. Yang, W.-B. Gan, Choice of cranial window type for in vivo imaging affects  
532 dendritic spine turnover in the cortex., *Nature neuroscience* 10 (2007) 549–51.
- 533 [18] P. J. Drew, A. Y. Shih, J. D. Driscoll, P. M. Knutsen, P. Blinder, D. Davalos, K. Akassoglou, P. S.  
534 Tsai, D. Kleinfeld, Chronic optical access through a polished and reinforced thinned skull, *Nature*  
535 *Methods* 7 (2010) 5–10.
- 536 [19] H. Li, N. Zhang, H.-Y. Lin, Y. Yu, Q.-Y. Cai, L. Ma, S. Ding, Histological, cellular and behav-  
537 ioral assessments of stroke outcomes after photothrombosis-induced ischemia in adult mice., *BMC*  
538 *neuroscience* 15 (2014) 58.
- 539 [20] A. L. Alexander, J. E. Lee, M. Lazar, A. S. Field, Diffusion tensor imaging of the brain., *Neu-*  
540 *rotherapeutics : the journal of the American Society for Experimental NeuroTherapeutics* 4 (2007)  
541 316–29.
- 542 [21] W.-B. Jung, Y. H. Han, J. J. Chung, S. Y. Chae, S. H. Lee, G. H. Im, J. Cha, J. H. Lee, Spatiotem-  
543 poral microstructural white matter changes in diffusion tensor imaging after transient focal ischemic  
544 stroke in rats, *NMR in Biomedicine* 30 (2017) e3704.
- 545 [22] E. S. Hui, F. Du, S. Huang, Q. Shen, T. Q. Duong, Spatiotemporal dynamics of diffusional kurtosis,  
546 mean diffusivity and perfusion changes in experimental stroke, *Brain Research* 1451 (2012) 100–109.
- 547 [23] Y. Benjamini, Y. Hochberg, Controlling the False Discovery Rate: A Practical and Powerful Ap-  
548 proach to Multiple Testing, 1995. URL: <https://www.jstor.org/stable/2346101>. doi:10.2307/  
549 2346101.

- 550 [24] C. B. Schaffer, B. Friedman, N. Nishimura, L. F. Schroeder, P. S. Tsai, F. F. Ebner, P. D. Lyden,  
551 D. Kleinfeld, Two-Photon Imaging of Cortical Surface Microvessels Reveals a Robust Redistribution  
552 in Blood Flow after Vascular Occlusion, *PLoS Biology* 4 (2006) e22.
- 553 [25] Z. J. Taylor, E. S. Hui, A. N. Watson, X. Nie, R. L. Deardorff, J. H. Jensen, J. A. Helpert, A. Y. Shih,  
554 Microvascular basis for growth of small infarcts following occlusion of single penetrating arterioles in  
555 mouse cortex., *Journal of cerebral blood flow and metabolism : official journal of the International*  
556 *Society of Cerebral Blood Flow and Metabolism* (2015) 0271678X15608388.
- 557 [26] B. Chen, B. Friedman, Q. Cheng, P. Tsai, E. Schim, D. Kleinfeld, P. D. Lyden, Severe blood brain  
558 barrier disruption and surrounding tissue injury, *Stroke* 40 (2010) 1–20.
- 559 [27] K. E. Sandoval, K. A. Witt, Blood-brain barrier tight junction permeability and ischemic stroke,  
560 *Neurobiology of Disease* 32 (2008) 200–219.
- 561 [28] M. Schilling, M. Besselmann, C. Leonhard, M. Mueller, E. B. Ringelstein, R. Kiefer, Microglial acti-  
562 vation precedes and predominates over macrophage infiltration in transient focal cerebral ischemia:  
563 A study in green fluorescent protein transgenic bone marrow chimeric mice, *Experimental Neurology*  
564 183 (2003) 25–33.
- 565 [29] H. Neumann, M. R. Kotter, R. J. M. Franklin, Debris clearance by microglia: an essential link  
566 between degeneration and regeneration., *Brain : a journal of neurology* 132 (2009) 288–95.
- 567 [30] T. Li, S. Zhang, Microgliosis in the Injured Brain, <http://dx.doi.org/10.1177/1073858415572079>  
568 (2015).
- 569 [31] R. K. Clark, E. V. Lee, C. J. Fish, R. F. White, W. J. Price, Z. L. Jonak, G. Z. Feuerstein,  
570 F. C. Barone, Development of tissue damage, inflammation and resolution following stroke: an  
571 immunohistochemical and quantitative planimetric study., *Brain research bulletin* 31 (1993) 565–72.

- 572 [32] R. L. Rungta, E. Chaigneau, B.-F. Osmanski, S. Charpak, Vascular Compartmentalization of Func-  
573 tional Hyperemia from the Synapse to the Pia., *Neuron* 0 (2018).
- 574 [33] Z. Shen, Z. Lu, P. Y. Chhatbar, P. O'Herron, P. Kara, An artery-specific fluorescent dye for studying  
575 neurovascular coupling, *Nature Methods* 9 (2012) 273–276.
- 576 [34] S. Watkins, S. Robel, I. F. Kimbrough, S. M. Robert, G. Ellis-Davies, H. Sontheimer, Disrup-  
577 tion of astrocyte-vascular coupling and the blood-brain barrier by invading glioma cells., *Nature*  
578 *communications* 5 (2014) 4196.
- 579 [35] W. Zhu, C. Acosta, B. MacNeil, C. Cortes, H. Intrater, Y. Gong, M. Namaka, Elevated expression  
580 of fractalkine (CX3CL1) and fractalkine receptor (CX3CR1) in the dorsal root ganglia and spinal  
581 cord in experimental autoimmune encephalomyelitis: implications in multiple sclerosis-induced neu-  
582 ropathic pain., *BioMed research international* 2013 (2013) 480702.
- 583 [36] T. Imai, K. Hieshima, C. Haskell, M. Baba, M. Nagira, M. Nishimura, M. Kakizaki, S. Takagi,  
584 H. Nomiya, T. J. Schall, O. Yoshie, Identification and molecular characterization of fractalkine  
585 receptor CX3CR1, which mediates both leukocyte migration and adhesion., *Cell* 91 (1997) 521–30.
- 586 [37] T. Li, S. Pang, Y. Yu, X. Wu, J. Guo, S. Zhang, Proliferation of parenchymal microglia is the main  
587 source of microgliosis after ischaemic stroke., *Brain : a journal of neurology* 136 (2013) 3578–88.
- 588 [38] Ł. A. Poniatowski, P. Wojdasiewicz, M. Krawczyk, D. Szukiewicz, R. Gasik, Ł. Kubaszewski,  
589 I. Kurkowska-Jastrzębska, Analysis of the Role of CX3CL1 (Fractalkine) and Its Receptor CX3CR1  
590 in Traumatic Brain and Spinal Cord Injury: Insight into Recent Advances in Actions of Neu-  
591 rochemokine Agents, *Molecular Neurobiology* 54 (2017) 2167–2188.
- 592 [39] T. Imai, K. Hieshima, C. Haskell, M. Baba, M. Nagira, M. Nishimura, M. Kakizaki, S. Takagi,  
593 H. Nomiya, T. J. Schall, O. Yoshie, Identification and Molecular Characterization of Fractalkine

- 594 Receptor CX3CR1, which Mediates Both Leukocyte Migration and Adhesion, *Cell* 91 (1997) 521–  
595 530.
- 596 [40] R. J. Nudo, Postinfarct cortical plasticity and behavioral recovery, *Stroke* 38 (2007) 840–845.
- 597 [41] M. van Meer, W. M. Otte, K. van der Marel, C. H. Nijboer, A. Kavelaars, J. W. B. van der  
598 Sprenkel, M. a. Viergever, R. M. Dijkhuizen, Extent of Bilateral Neuronal Network Reorganization  
599 and Functional Recovery in Relation to Stroke Severity, *Journal of Neuroscience* 32 (2012) 4495–  
600 4507.
- 601 [42] N. G. Harris, D. R. Verley, B. A. Gutman, R. L. Sutton, Bi-directional changes in fractional  
602 anisotropy after experiment TBI: Disorganization and reorganization?, *NeuroImage* 133 (2016) 129–  
603 143.
- 604 [43] S. N. Niogi, P. Mukherjee, Diffusion Tensor Imaging of Mild Traumatic Brain Injury, *Journal of*  
605 *Head Trauma Rehabilitation* 25 (2010) 241–255.
- 606 [44] A. L. Alexander, J. E. Lee, M. Lazar, A. S. Field, Diffusion tensor imaging of the brain., *Neu-*  
607 *rotherapeutics : the journal of the American Society for Experimental NeuroTherapeutics* 4 (2007)  
608 316–29.
- 609 [45] H. M. Feldman, J. D. Yeatman, E. S. Lee, L. H. F. Barde, S. Gaman-Bean, Diffusion tensor imaging:  
610 a review for pediatric researchers and clinicians., *Journal of developmental and behavioral pediatrics*  
611 : *JDBP* 31 (2010) 346–56.
- 612 [46] A. Y. Shih, P. Blinder, P. S. Tsai, B. Friedman, G. Stanley, P. D. Lyden, D. Kleinfeld, The  
613 smallest stroke: occlusion of one penetrating vessel leads to infarction and a cognitive deficit., *Nature*  
614 *neuroscience* 16 (2013) 55–63.
- 615 [47] F. Aloisi, Immune function of microglia., *Glia* 36 (2001) 165–79.

- 616 [48] G. Wang, J. Zhang, X. Hu, L. Zhang, L. Mao, X. Jiang, A. K.-F. Liou, R. K. Leak, Y. Gao, J. Chen,  
617 Microglia/macrophage polarization dynamics in white matter after traumatic brain injury., *Journal*  
618 *of cerebral blood flow and metabolism : official journal of the International Society of Cerebral Blood*  
619 *Flow and Metabolism* 33 (2013) 1864–74.
- 620 [49] R. A. Hill, A. M. Li, J. Grutzendler, Lifelong cortical myelin plasticity and age-related degeneration  
621 in the live mammalian brain, *Nature Neuroscience* (2018) 1.
- 622 [50] A. Lampron, A. Larochelle, N. Laflamme, P. Préfontaine, M.-M. Plante, M. G. Sánchez, V. W. Yong,  
623 P. K. Stys, M.-È. Tremblay, S. Rivest, Inefficient clearance of myelin debris by microglia impairs  
624 remyelinating processes., *The Journal of experimental medicine* 212 (2015) 481–95.
- 625 [51] G. K. Sheridan, K. J. Murphy, Neuron-glia crosstalk in health and disease: fractalkine and CX3CR1  
626 take centre stage., *Open biology* 3 (2013) 130181.
- 627 [52] H. Wake, A. J. Moorhouse, A. Miyamoto, J. Nabekura, Microglia: actively surveying and shaping  
628 neuronal circuit structure and function., *Trends in neurosciences* 36 (2013) 209–17.
- 629 [53] J. Zhang, M. Aggarwal, S. Mori, Structural insights into the rodent CNS via diffusion tensor imaging,  
630 *Trends in Neurosciences* 35 (2012) 412–421.
- 631 [54] M. D. Budde, L. Janes, E. Gold, L. C. Turtzo, J. A. Frank, The contribution of gliosis to diffusion  
632 tensor anisotropy and tractography following traumatic brain injury: validation in the rat using  
633 Fourier analysis of stained tissue sections, *Brain* 134 (2011) 2248–2260.
- 634 [55] Q. Jiang, Z. G. Zhang, L. Ding, B. Silver, L. Zhang, H. Meng, M. Lu, S. Pourabdillah-nejed d,  
635 L. Wang, S. Savant-bhonsale, L. Li, H. Bagher-ebadian, J. Hu, A. S. Arbab, P. Vanguri, J. R. Ewing,  
636 K. A. Ledbetter, M. Chopp, MRI detects white matter reorganization after neural progenitor cell  
637 treatment of stroke, *NeuroImage* 32 (2006) 1080–1089.

- 638 [56] A. Thiel, W.-D. Heiss, Imaging of microglia activation in stroke., *Stroke; a journal of cerebral*  
639 *circulation* 42 (2011) 507–12.
- 640 [57] G. Scott, H. Zetterberg, A. Jolly, J. H. Cole, S. De Simoni, P. O. Jenkins, C. Feeney, D. R. Owen,  
641 A. Lingford-Hughes, O. Howes, M. C. Patel, A. P. Goldstone, R. N. Gunn, K. Blennow, P. M.  
642 Matthews, D. J. Sharp, Minocycline reduces chronic microglial activation after brain trauma but  
643 increases neurodegeneration, *Brain* 141 (2018) 459–471.
- 644 [58] H. Neumann, M. R. Kotter, R. J. M. Franklin, Debris clearance by microglia: an essential link  
645 between degeneration and regeneration, *Brain* 132 (2008) 288–295.
- 646 [59] C. Yu, C. Zhu, Y. Zhang, H. Chen, W. Qin, M. Wang, K. Li, A longitudinal diffusion tensor imaging  
647 study on Wallerian degeneration of corticospinal tract after motor pathway stroke, *NeuroImage* 47  
648 (2009) 451–458.
- 649 [60] J. D. Hinman, The back and forth of axonal injury and repair after stroke., *Current opinion in*  
650 *neurology* 27 (2014) 615–23.
- 651 [61] X. Hu, P. Li, Y. Guo, H. Wang, R. K. Leak, S. Chen, Y. Gao, J. Chen, Microglia/macrophage  
652 polarization dynamics reveal novel mechanism of injury expansion after focal cerebral ischemia,  
653 *Stroke* 43 (2012) 3063–3070.
- 654 [62] A. R. Patel, R. Ritzel, L. D. McCullough, F. Liu, Microglia and ischemic stroke: a double-edged  
655 sword., *International journal of physiology, pathophysiology and pharmacology* 5 (2013) 73–90.
- 656 [63] D. H. Lim, J. M. LeDue, M. H. Mohajerani, T. H. Murphy, Optogenetic mapping after stroke reveals  
657 network-wide scaling of functional connections and heterogeneous recovery of the peri-infarct., *The*  
658 *Journal of neuroscience : the official journal of the Society for Neuroscience* 34 (2014) 16455–66.
- 659 [64] D. G. Johnston, M. Denizet, R. Mostany, C. Portera-Cailliau, Chronic in vivo imaging shows no

- 660 evidence of dendritic plasticity or functional remapping in the contralesional cortex after stroke.,  
661 Cerebral cortex (New York, N.Y. : 1991) 23 (2013) 751–62.
- 662 [65] M. Hallett, Plasticity of the human motor cortex and recovery from stroke, Brain Research Reviews  
663 36 (2001) 169–174.
- 664 [66] J. Biernaskie, A. Szymanska, V. Windle, D. Corbett, Bi-hemispheric contribution to functional  
665 motor recovery of the affected forelimb following focal ischemic brain injury in rats., The European  
666 journal of neuroscience 21 (2005) 989–99.
- 667 [67] M. P. A. van Meer, K. van der Marel, K. Wang, W. M. Otte, S. el Bouazati, T. A. P. Roeling, M. A.  
668 Viergever, J. W. Berkelbach van der Sprenkel, R. M. Dijkhuizen, Recovery of Sensorimotor Function  
669 after Experimental Stroke Correlates with Restoration of Resting-State Interhemispheric Functional  
670 Connectivity, Journal of Neuroscience 30 (2010) 3964–3972.
- 671 [68] J. D. Schaechter, C. I. Moore, B. D. Connell, B. R. Rosen, R. M. Dijkhuizen, Structural and  
672 functional plasticity in the somatosensory cortex of chronic stroke patients, Brain 129 (2006) 2722–  
673 2733.
- 674 [69] G. Silasi, T. H. Murphy, Stroke and the connectome: how connectivity guides therapeutic interven-  
675 tion., Neuron 83 (2014) 1354–68.
- 676 [70] S. J. Van Veluw, A. Y. Shih, E. E. Smith, C. Chen, J. A. Schneider, J. M. Wardlaw, S. M. Greenberg,  
677 J. Biessels, Review Detection, risk factors, and functional consequences of cerebral microinfarcts,  
678 The Lancet Neurology 16 (2017) 730–740.
- 679 [71] X. Zhu, R. A. Hill, D. Dietrich, M. Komitova, R. Suzuki, A. Nishiyama, Age-dependent fate and  
680 lineage restriction of single NG2 cells, Development 138 (2011) 745–753.
- 681 [72] J. K. Lee, L. C. Case, A. F. Chan, Y. Zhu, M. Tessier-Lavigne, B. Zheng, Generation of an  
682 *OMgp* allelic series in mice, genesis 47 (2009) 751–756.

- 683 [73] Q.-T. Nguyen, P. S. Tsai, D. Kleinfeld, MPScope: A versatile software suite for multiphoton mi-  
684 croscopy, *Journal of Neuroscience Methods* 156 (2006) 351–359.
- 685 [74] T. A. Pologruto, B. L. Sabatini, K. Svoboda, ScanImage: flexible software for operating laser  
686 scanning microscopes., *BioMedical Engineering OnLine* 2 (2003) 13.
- 687 [75] I. Valmianski, A. Y. Shih, J. D. Driscoll, D. W. Matthews, Y. Freund, D. Kleinfeld, Automatic iden-  
688 tification of fluorescently labeled brain cells for rapid functional imaging., *Journal of neurophysiology*  
689 104 (2010) 1803–11.
- 690 [76] Z. J. Taylor, A. Y. Shih, Targeted Occlusion of Individual Pial Vessels of Mouse Cortex., *Bio-protocol*  
691 3 (2013).
- 692 [77] Leemans A, Jeurissen B, Sijbers J, Jones D. K., ExploreDTI: a graphical toolbox for processing,  
693 analyzing, and visualizing diffusion MR data, in 17th Annual Meeting of Intl. Soc. Mag. Reson.  
694 Med. (Hawaii: ), 3537. (2009).
- 695 [78] Y. Assaf, O. Pasternak, Diffusion Tensor Imaging (DTI)-based White Matter Mapping in Brain  
696 Research: A Review, *Journal of Molecular Neuroscience* 34 (2008) 51–61.



697 **8. Figures**

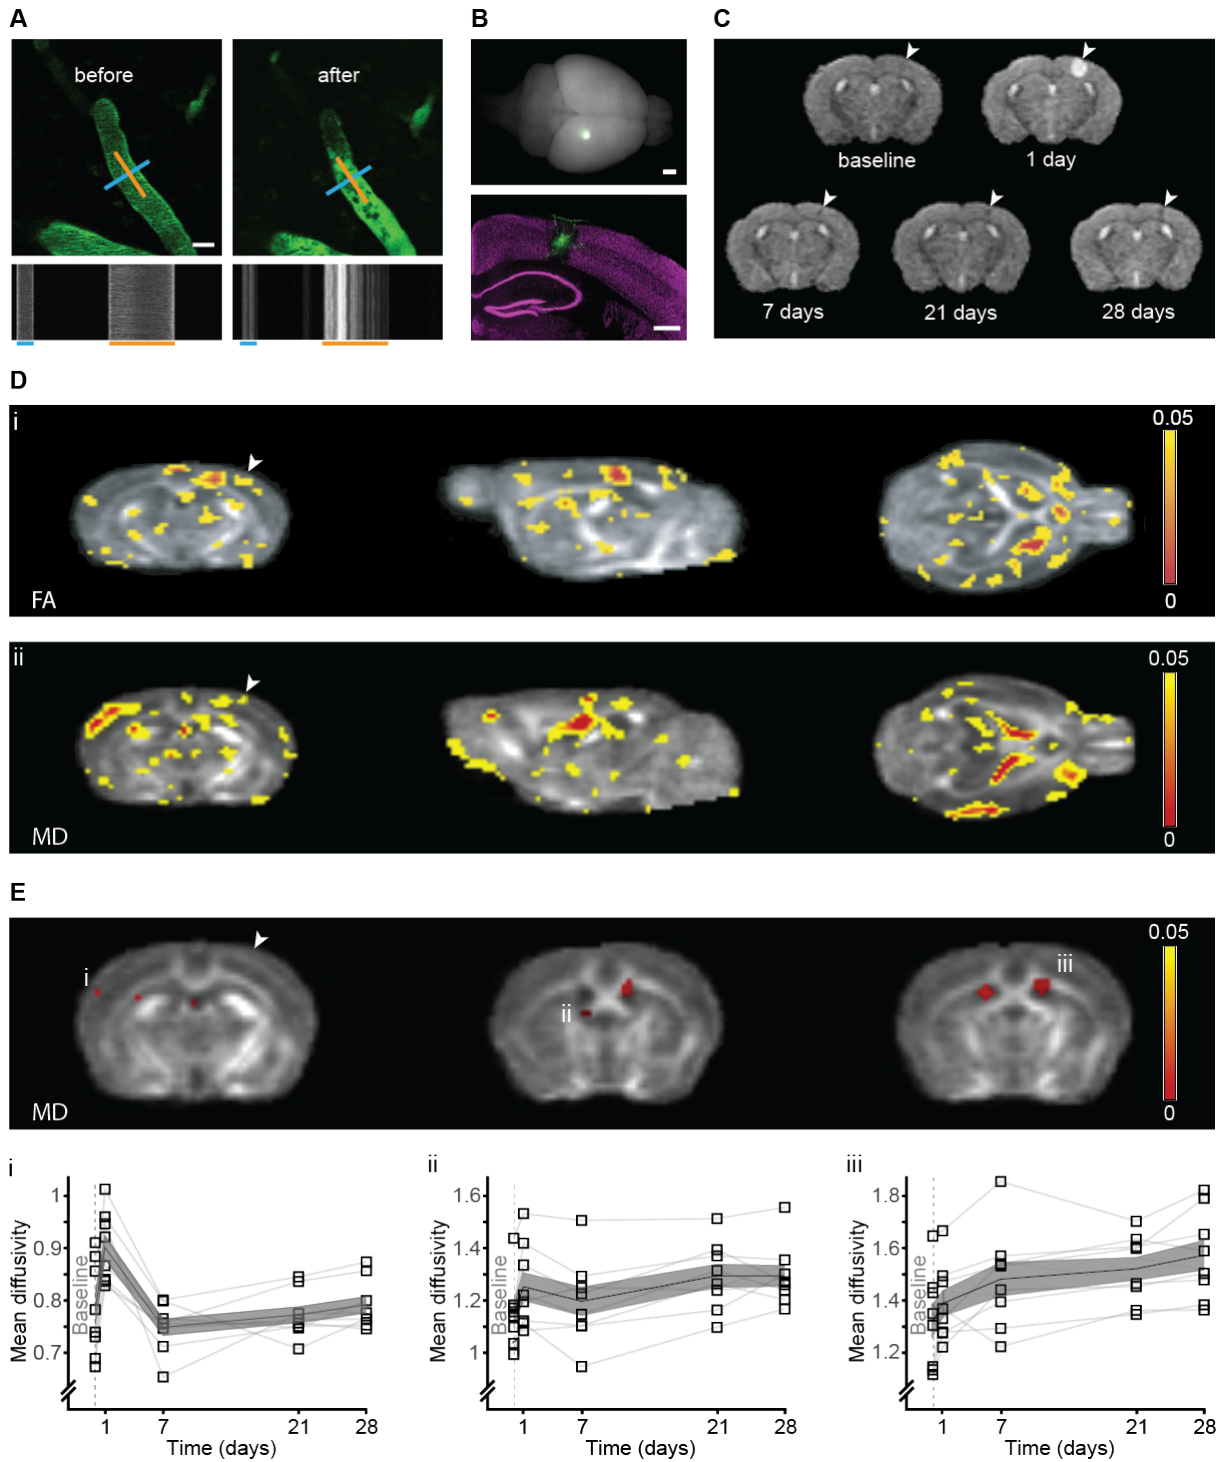

Figure 1: (Caption on next page)

Figure 1: (Previous page) **Targeted photothrombotic occlusion of single penetrating vessel leads to widespread structural remodeling.** (A) Intravital imaging of a C57BL/6J WT mouse pial vessels before (left) and 5 min after (right) occlusion of a single penetrating artery. Blood plasma was labeled with FITC-dextran (2000kDa). Line-scan of the blood flow pattern in the targeted blood vessels allowed extraction of the blood vessel diameter and direction of the blood flow; blue and orange lines respectively and corresponding time-space linescans (bottom). (B) A whole mouse brain 14 days after targeted photothrombotic occlusion, note the FITC-dextran retention surrounding the occluded area (green, bottom panel). NeuN staining (magenta) indicated the occlusion size in the cortex. (C) Temporal evolution of T2 in a single WT mouse: hyperintense signal at the infarct area 24h post occlusion disappears at 7 days post occlusion until only a small hypointense signal at the same area was left at 28 days post occlusion. (D) Statistical FA (i) and MD (ii) maps of the main effect of time post micro-occlusion superimposed on an averaged FA map of all mice. Voxels that exceeded a statistical threshold of  $p < 0.05$  (Repeated measure ANOVA,  $n=8$ ) are colored according to the threshold they exceeded. (E) Clusters that exceeded a statistical threshold of  $p < 0.05$  corrected for multiple comparisons (FDR) of the MD maps. Examples of clusters showing significant change in MD through time, in the contralateral somatosensory cortex (i), contralateral fimbria of the hippocampus (ii) and and in the ipsi and contralateral ventricles (iii). (D-E) Arrowhead indicates the occlusion area. Scale bar: A:20m, B: 1mm, 500m.

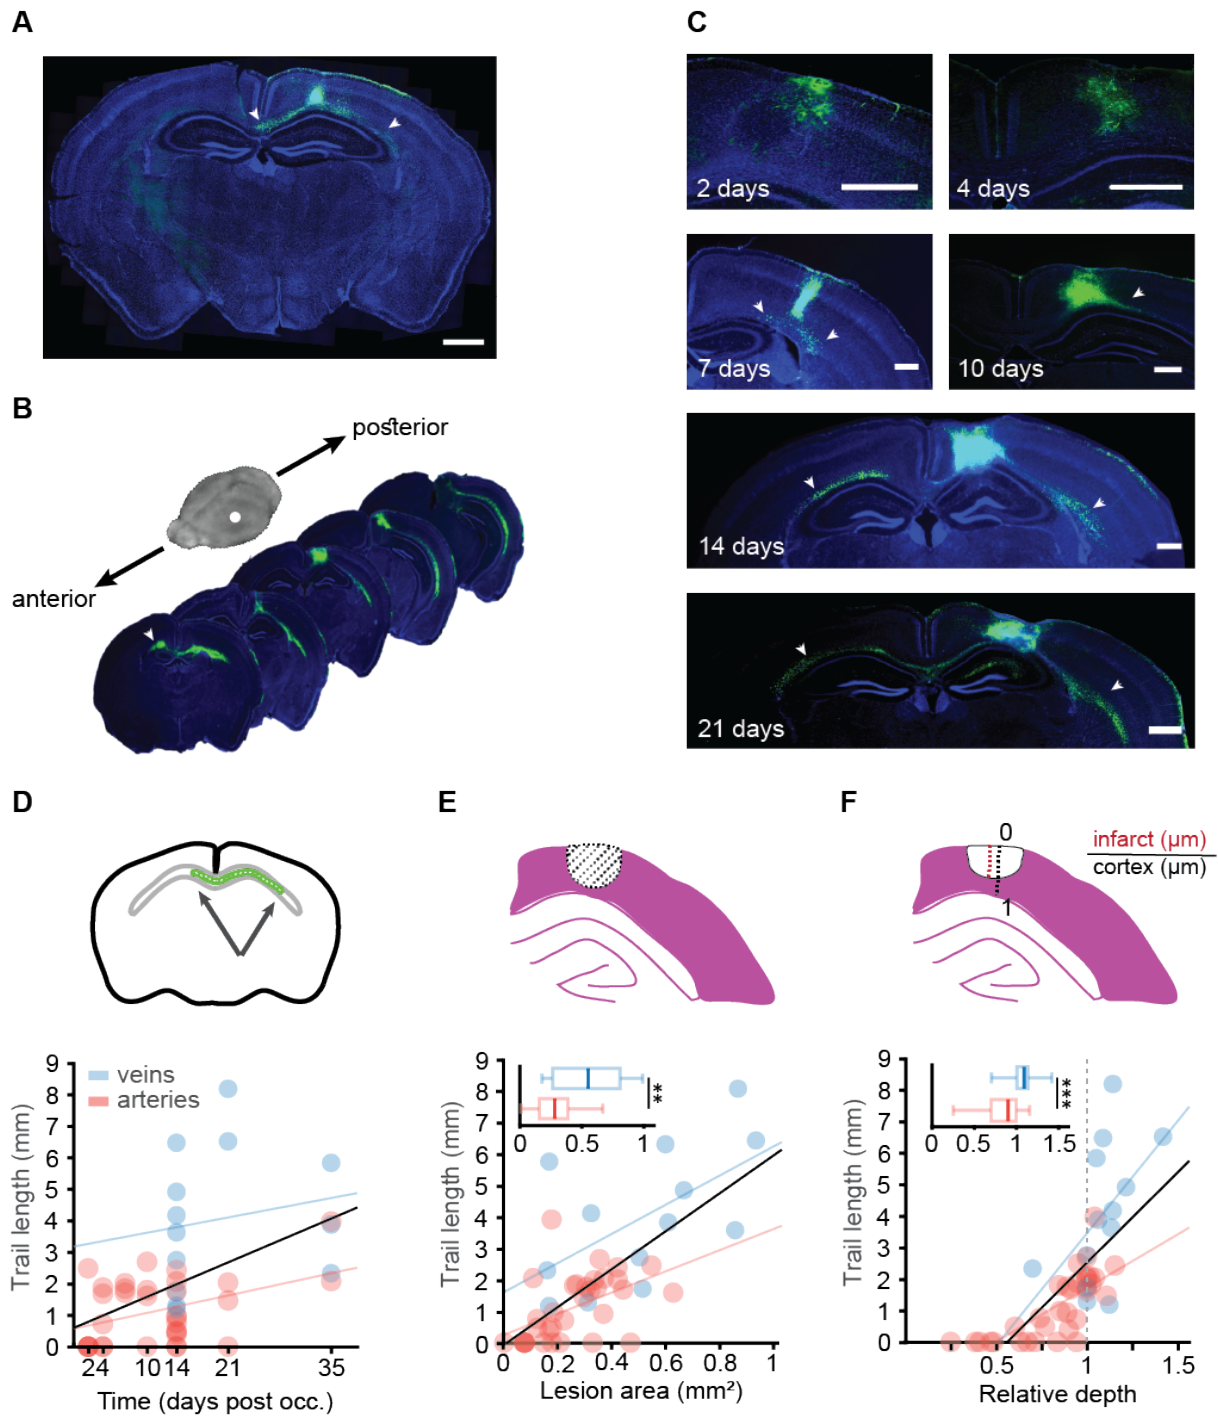

Figure 2: (Caption on next page)

Figure 2: (Previous page) **Occlusion of a single penetrating blood vessel leads to distal FITC-dextran accumulation.** (A) Coronal slice of DTI-scanned mouse (Fig 1C) shows FITC-dextran retention in the occlusion site and the underlying white matter (green). (B) Representative brain slices of a mouse sacrificed 14 days after the occlusion, demonstrates FITC presence at more anterior and posterior areas of the white matter from the occlusion site. (C) FITC-dextran presence at different time points after targeted photothrombotic occlusion induction: 2, 4, 7, 10, 14, 21 and 35 days. Cell nuclei marked with DAPI. At early time points the FITC-dextran was at the cyst area but later reached the subcortical white matter, creating a trail of FITC labeled cells that even crossed to the contralateral hemisphere. (D) Trail length was correlated with time post occlusion for all blood vessels ( $p=0.001$ ,  $R^2=0.22$ , Black), but separately it was significantly correlated with arteries ( $p=0.0195$ ,  $R^2=0.1637$ , red) but not for veins ( $p=0.56$ ,  $R^2=0.03$ , blue). (E) Infarct area was correlated with trail length for all blood vessels ( $p<0.0001$ ,  $R^2=0.4814$ , Black), and separately for arteries ( $p=0.0038$ ,  $R^2=0.24$ , red,  $n=33$ ) and veins  $p=0.037$ ,  $R^2=0.3385$ , blue,  $n=13$ ). Total lesion area was larger in veins ( $p=0.0057$ , Mann-Whitney). (F) Infarct relative depth was also correlated with trail length for all blood vessels ( $p<0.0001$ ,  $R^2=0.488$ , Black), and separately for arteries ( $p<0.0001$ ,  $R^2=0.5536$ , red,  $n=33$ ), but not for veins ( $p=0.0705$ ,  $R^2=0.2671$ , blue,  $n=13$ ). Total infarct depth was larger in veins ( $p=0.0007$ , student's t-test). Insets in figures D-F show the metric that was used to measure each variable. Scale bar: A:1mm, C:500m.

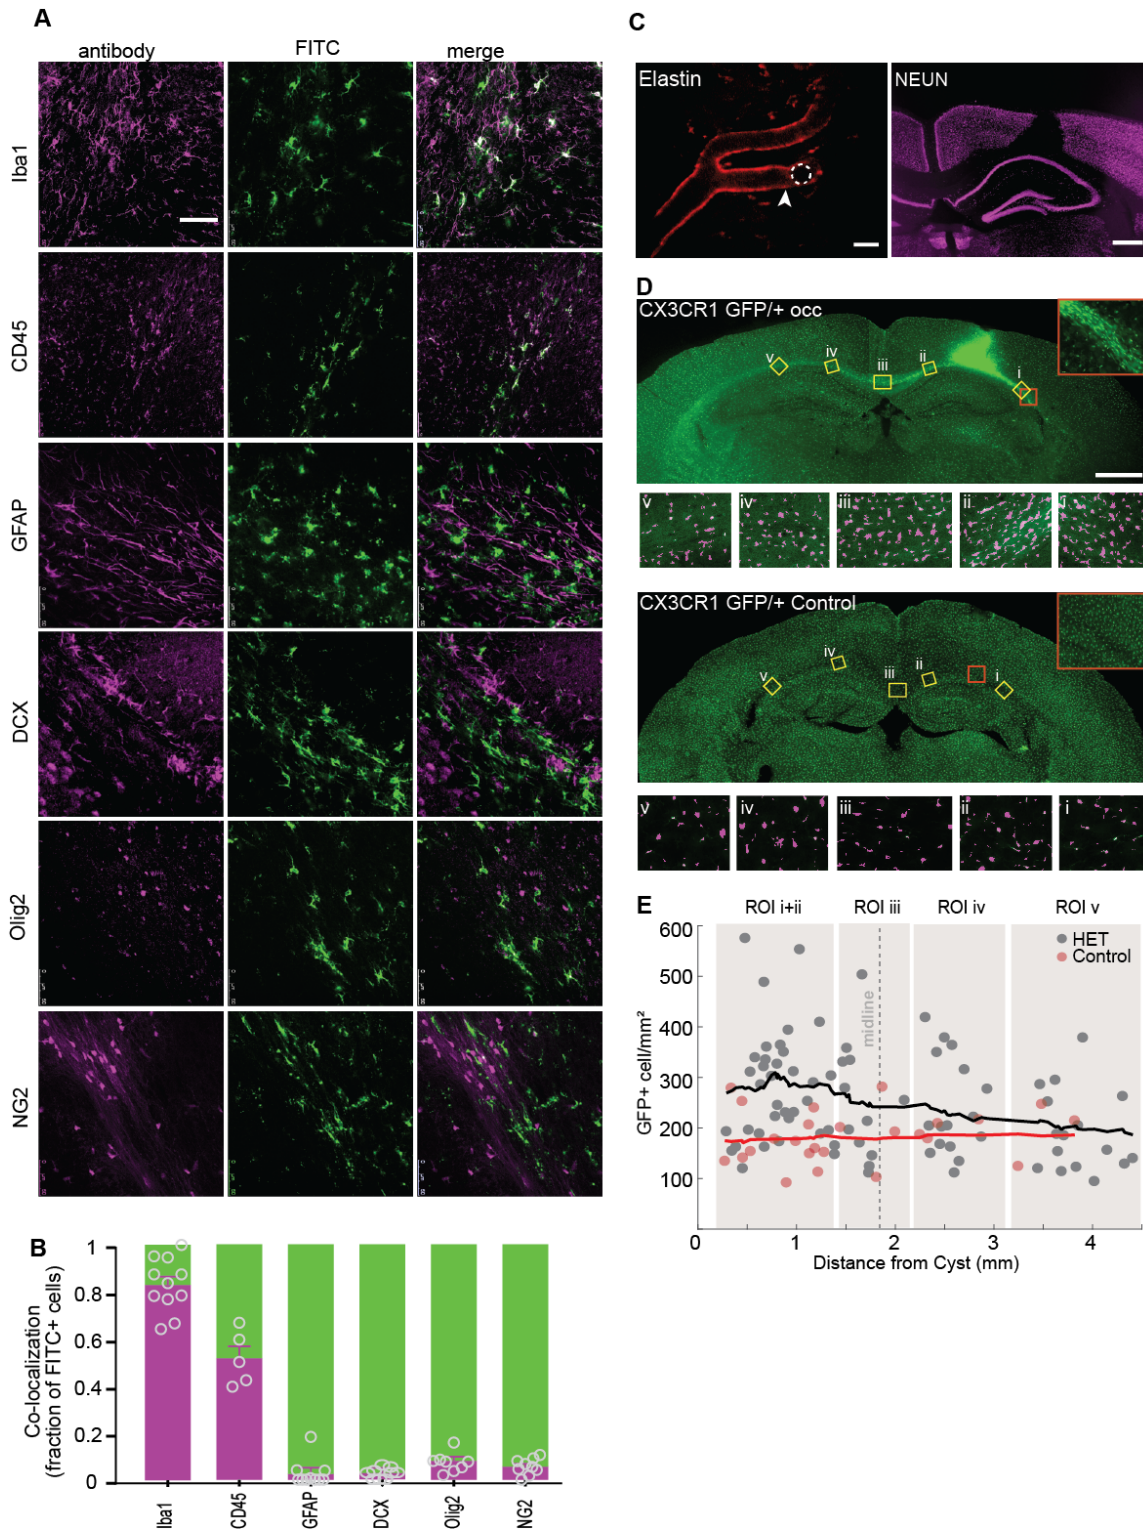

Figure 3: (Caption on next page)

Figure 3: (Previous page) **The trail is formed mainly by microglia/macrophage cells** (A) Analysis of brain sections that were obtained from wild type C57BL/6 adult mice, 14 days post targeted photothrombotic occlusion. Sections were stained for different markers in order to characterize the identity of the FITC-dextran binding cells. The majority of FITC-dextran positive cells (green) along the trail that was formed on the corpus callosum were co-labeled (white) with Iba1 (83%) microglia/macrophage marker, and CD45 (51%) leukocyte marker. Astrocytic (GFAP), Oligodendrocytic (Olig2) and neurogenesis (DCX) markers were not colocalized with the FITC-dextran (2% colocalization), whereas NG2 mice revealed 6% co-localization that may be due to their ability to differentiate into microglia cells. (B) Quantification of colocalization of FITC-dextran with the different markers. (C) Two-photon image of a penetrating artery labeled with Alexa fluor 633 hydrazide, arrowhead points to the occluded blood vessel (left). Targeted occlusion in CX3CR1<sup>GFP/+</sup> mice without labeling the blood plasma led to small infarct in the cortex as visualized by NeuN staining (right). (D) GFP+ density was measured in 5 ROIs along the corpus callosum of CX3CR1<sup>GFP/+</sup> occluded and control mice, 14 days after micro-occlusion induction. Representative images of automatically identified cells in each ROI are shown below each group (magenta). (E) CX3CR1-GFP cell density plotted as distance from the infarct core, with trend lines (running average, width 25 data points) for distance from infarct core. Mixed-effect general linear model showed that the occlusion led to higher microglia/macrophage density on the white matter tracts near the occlusion site that decreased further away from the occlusion to control levels; all model terms have significant p-values below 0.001, DF = 101. Scale bar: A: 50m, C: 20m, 500m, D: 1mm.

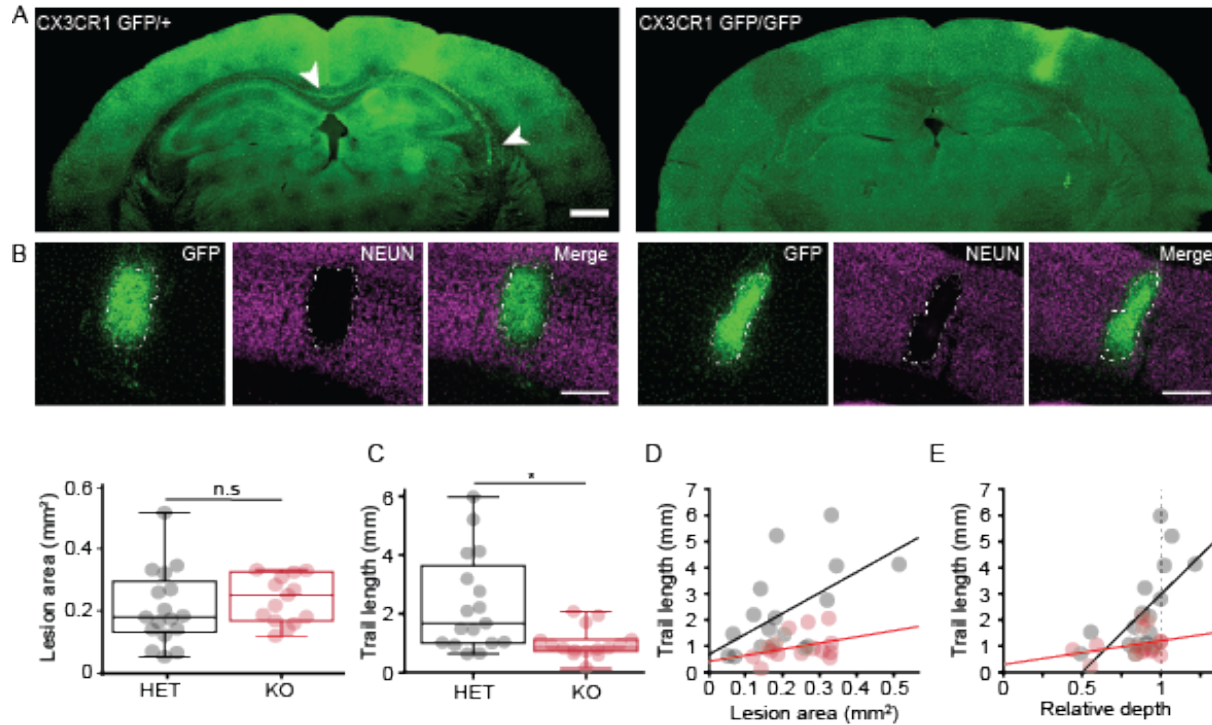

Figure 4: **Trail length following targeted photothrombotic occlusion is CX3CR1 dependent** (A) Representative images of CX3CR1 heterozygous and KO mice 14 days after targeted photothrombotic occlusion. (B) The occlusion led to GFP+ cell accumulation in the cyst of both genotypes. The infarct area, delineated in the NeuN staining, was not different between CX3CR1<sup>GFP/+</sup> (0.210.03mm<sup>2</sup>, n=17) and CX3CR1<sup>GFP/GFP</sup> mice (0.240.02 mm<sup>2</sup>, n=15, p=0.387 Students t-test). (C) The mean trail length was significantly longer in CX3CR1<sup>GFP/+</sup> mice compared to CX3CR1<sup>GFP/GFP</sup> (p=0.0047, Mann-Whitney), reaching as far as the contralateral hemisphere in 30% of the cases. (D) Correlation between trail length and infarct area for CX3CR1<sup>GFP/+</sup> (R<sup>2</sup>=0.324, p=0.0171, black) and CX3CR1<sup>GFP/GFP</sup> (R<sup>2</sup>=0.177, p=0.2107, red). (E) Correlation between trail length and relative infarct depth for CX3CR1<sup>GFP/+</sup> (R<sup>2</sup>=0.394, p=0.007, black) and CX3CR1<sup>GFP/GFP</sup> (R<sup>2</sup>=0.092, p=0.2715, red). Scale bar: A: 1mm, B: 500m.



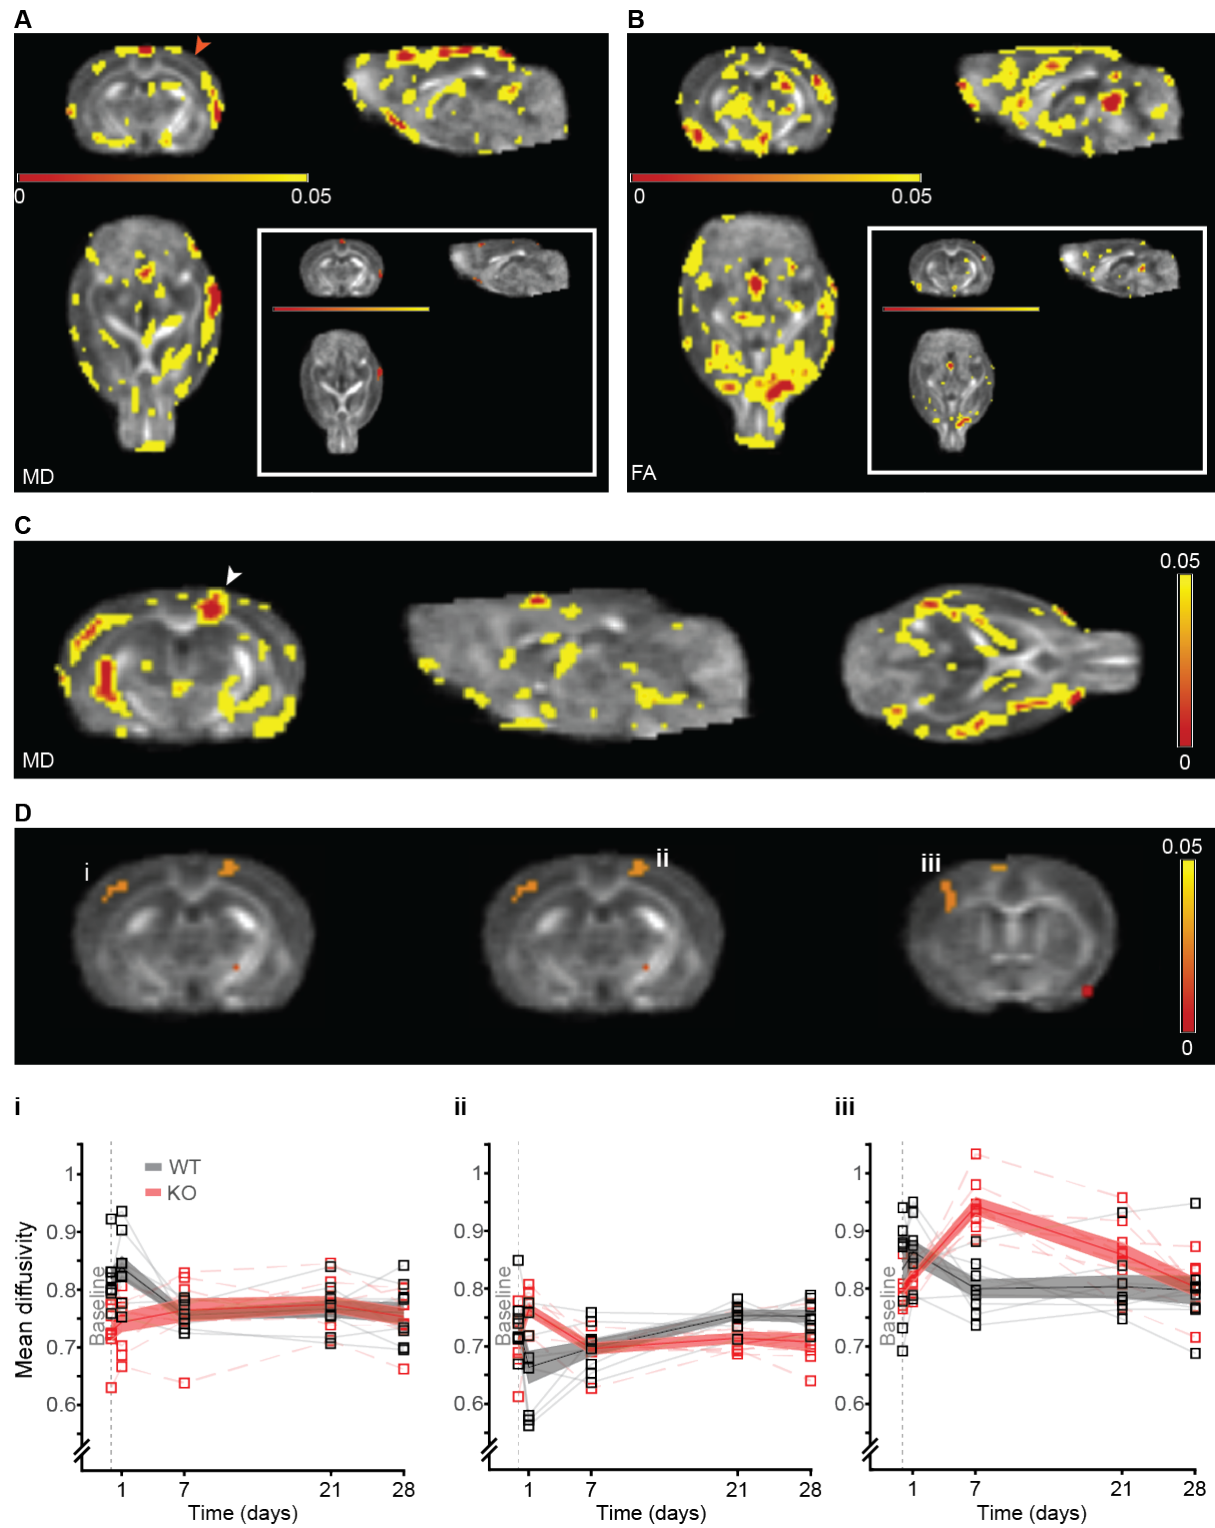

Figure 5: (Caption on next page)

Figure 5: (Previous page) **WT and KO respond to the microinfarct in a different manner** (A) Statistical parametric maps of the the main effect of group, regardless of time point, between WT (n=8) and KO (n=8) mice for mean diffusivity (MD) and (B) fractional anisotropy (FA). The statistical maps are superimposed on an averaged FA map of all scanned mice. Voxels that exceeded a statistical threshold of  $p < 0.05$  (repeated measure ANOVA) are colored according to the threshold they exceeded. Inset shows regional clusters that exceeded a statistical threshold of  $p < 0.05$  corrected for multiple comparisons (FDR). (C) Multiregional interaction between scan time and group ( $p < 0.05$ , repeated measure ANOVA) (white arrowhead indicates the occlusion area) of the MD. (D) the clusters after FDR correction ( $p < 0.05$ ) for the MD parameter, including contralateral primary somatosensory dorsal area (i), ipsilesional somatosensory cortex (occlusion site) (ii) and contralateral primary somatosensory frontal area (iii), show that the two genotypes respond to the targeted occlusion in a different manner.

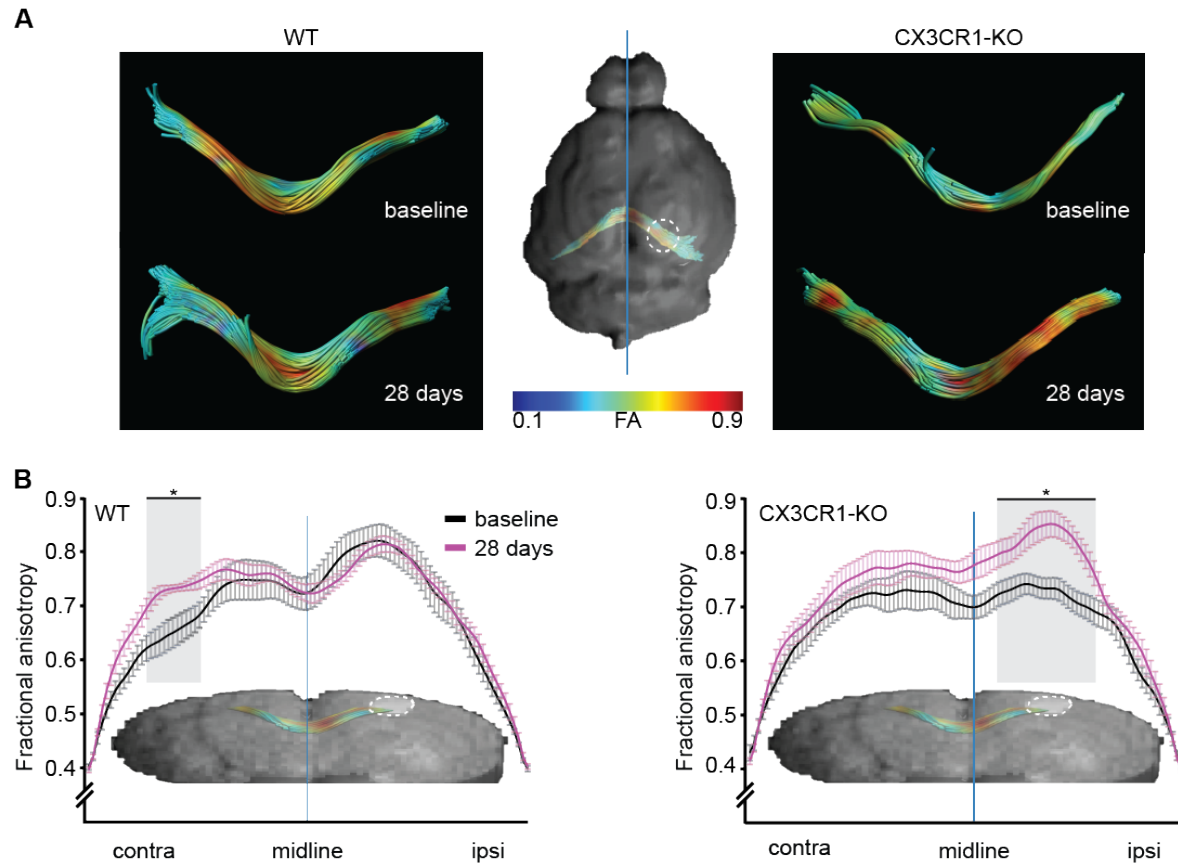

Figure 6: Microinfarct alters fiber-integrity in WT mice in a more distal manner compared to the local effect in  $CX3CR1^{GFP/GFP}$  mice (A) FA values across the corpus callosum (CC) were compared between the last time point (4 weeks post occlusion) to the baseline scan. Representative images of the tracts color coded for FA values, from low (blue) to high (red). Mean FA values were plotted as function of location at baseline scan (black) and 28 days post occlusion (magenta). (B) A significant difference ( $p < 0.005$ , ANOVA followed by Tukey's post hoc) in FA values between the two time points was found, along distinct areas of the corpus callosum, such as the ipsilesional CC of  $CX3CR1^{GFP/GFP}$  mice and contralesional CC of the WT mice. Asterisk marks the areas where a significant difference between the means of the two time points was found.

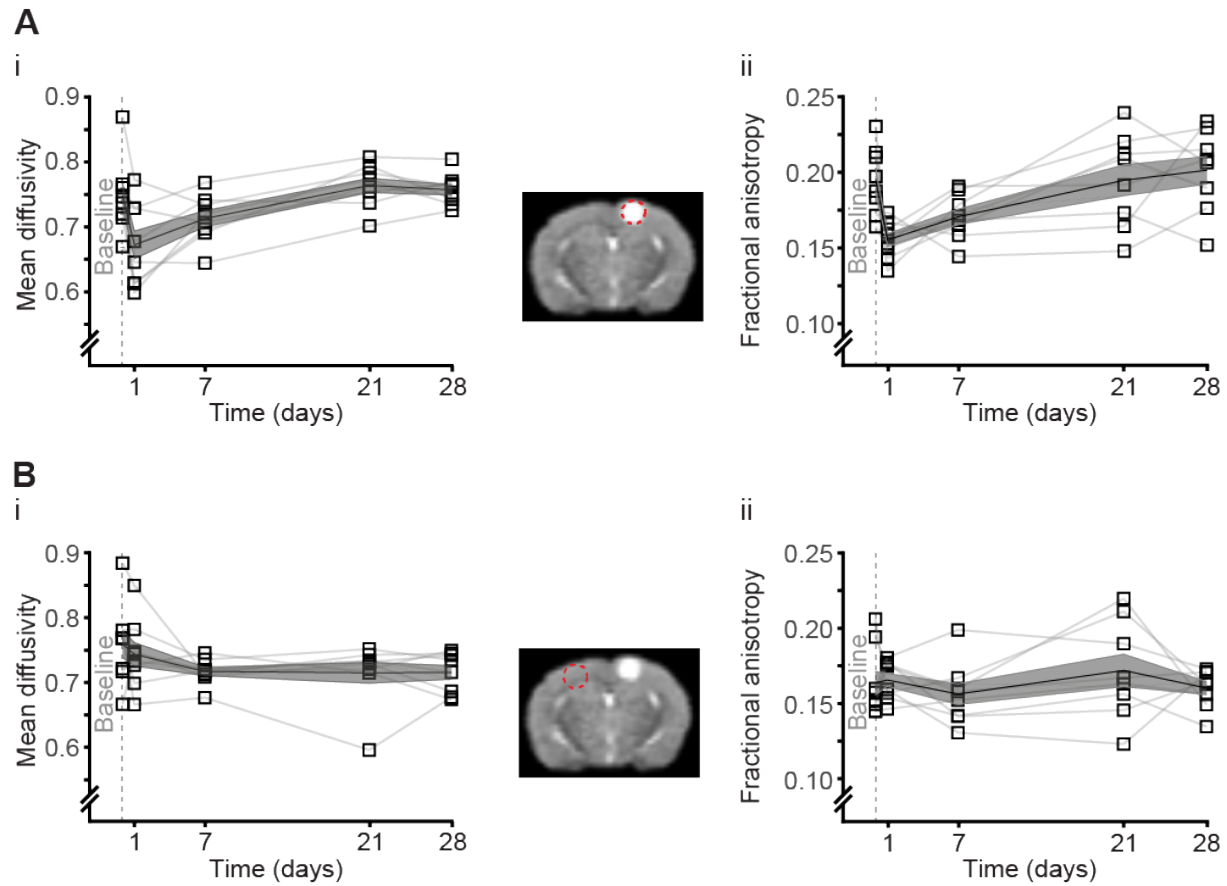

Supplementary Fig S1: Region based analysis of the occlusion and contralateral area (A) Region-based analysis of MD (i) and FA (ii) values in the occlusion area somatosensory (SS) cortex show tissue alterations in response to the micro-infarct, while (B) presents the mirror region in the contralateral hemisphere where the MD (i) and FA (ii) values do not change through time in response to the occlusion.

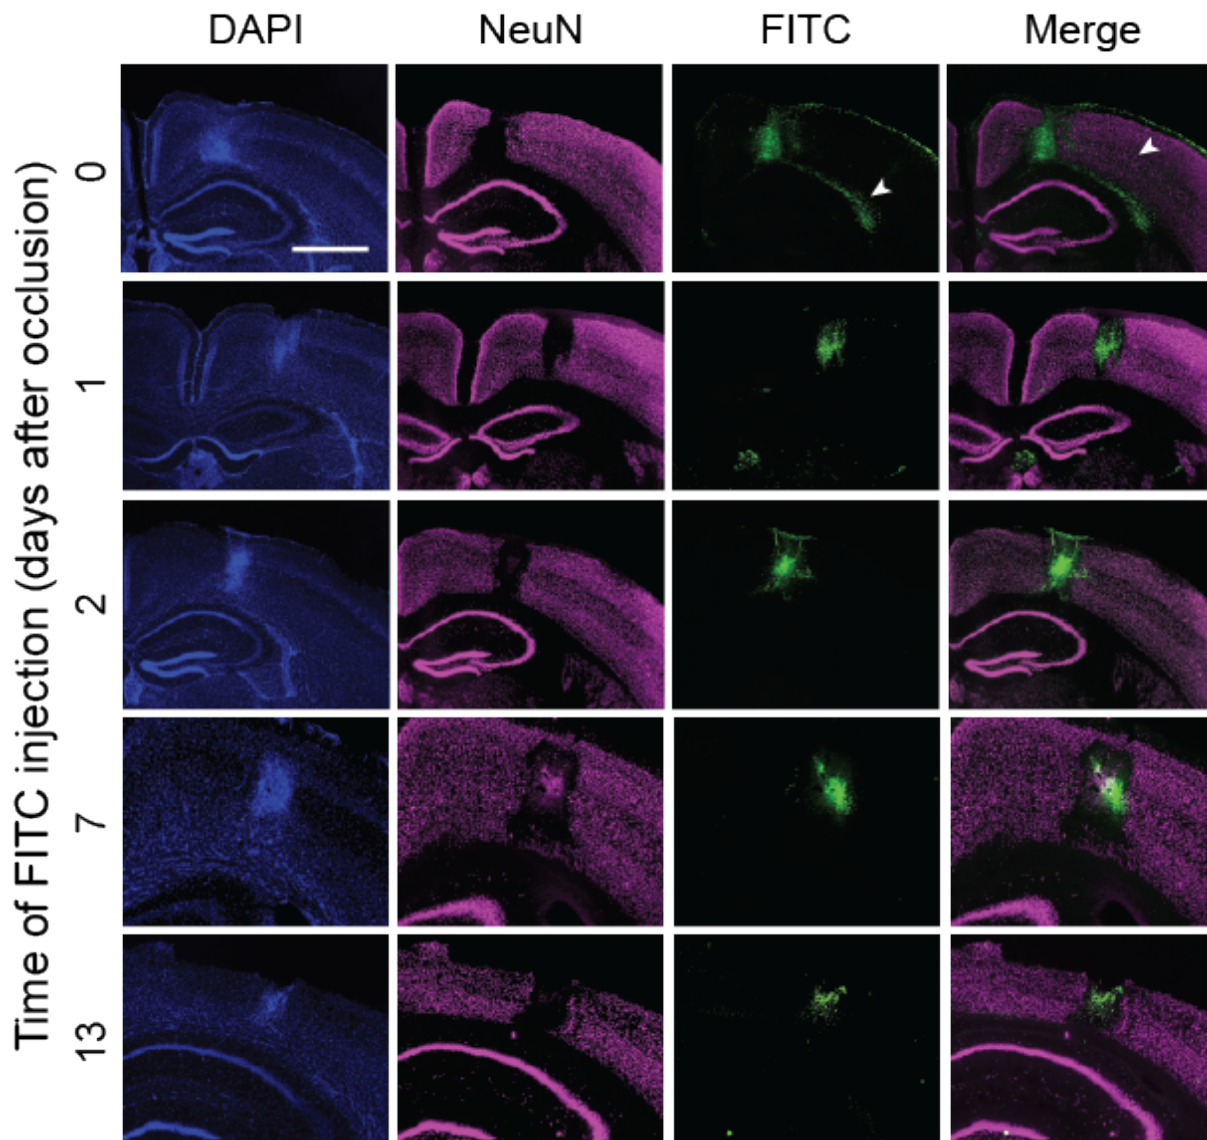

Supplementary Fig S2: FITC did not infiltrate to the white matter from the periphery. FITC injection to the bloodstream at 0,1,2,7 and 14 days post occlusion with Texas Red (2000 kD) shows a presence of the FITC-dextran on the corpus callosum only on day 0 but none at later time points. Scale bar: 1mm.

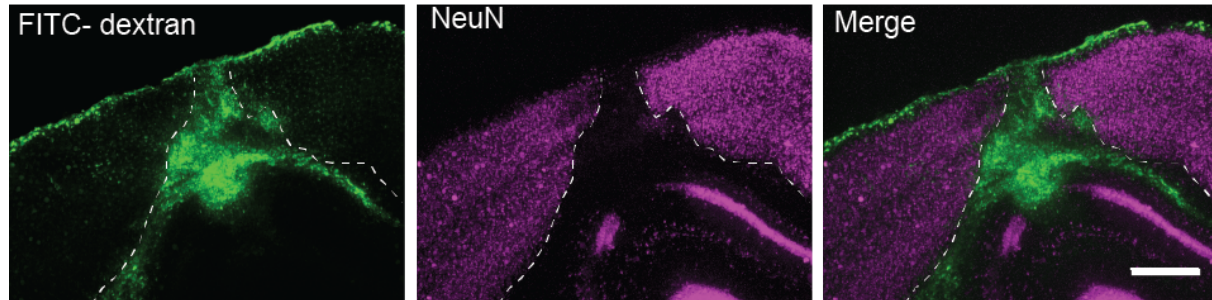

Supplementary Fig S3: FITC-dextran accumulation was observed in the pial surface. Scale: 500m

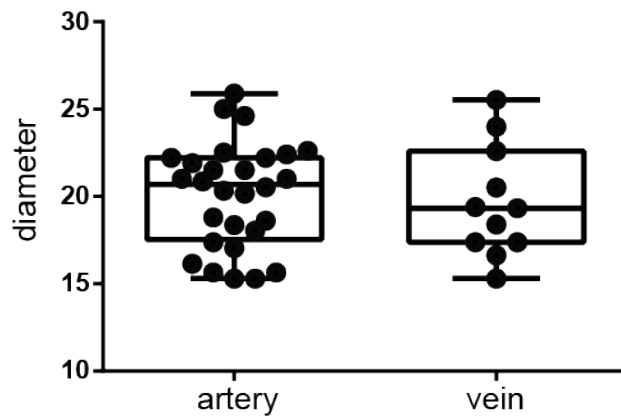

Supplementary Fig S4: Distribution of the diameter of occluded blood vessels in wild type mice. The average diameter between the genotypes was similar (20.10.56m for arteries n=28 and 19.670.96m for veins n=11; p=0.707, Students t-test)

A

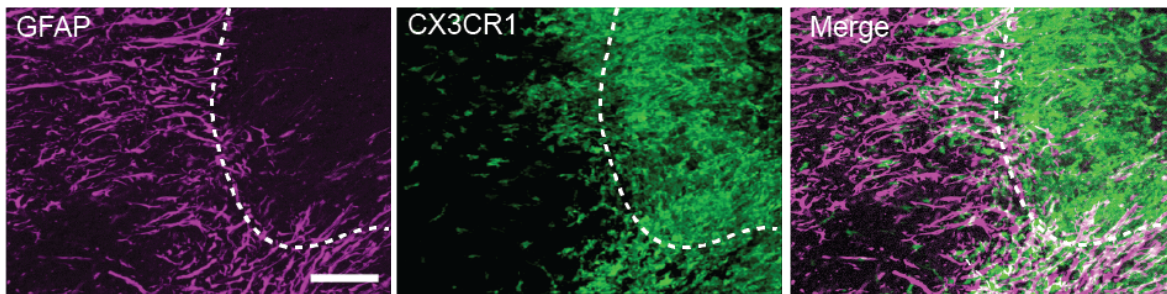

B

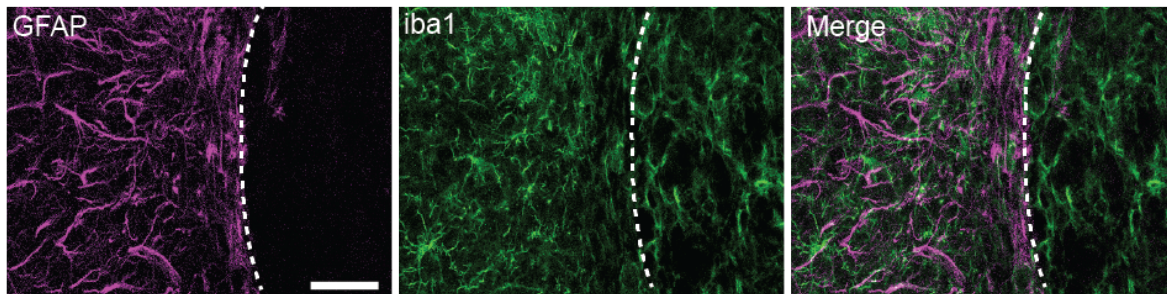

Supplementary Fig S5: **Astrocytes surrounded the injured site and formed glial scar, but did not enter the lesion core** High-magnification of the infarct border where the astrocytes create glial scar surrounding the core. In the ischemic cortex, a clear distinction is seen between the astrocytes (GFAP, magenta) outside the infarct area and the microglia/macrophages that are inside the core, in (A) CX3CR1-GFP mice and (B) WT mice with iba1 staining (green).

Scale: 20m.

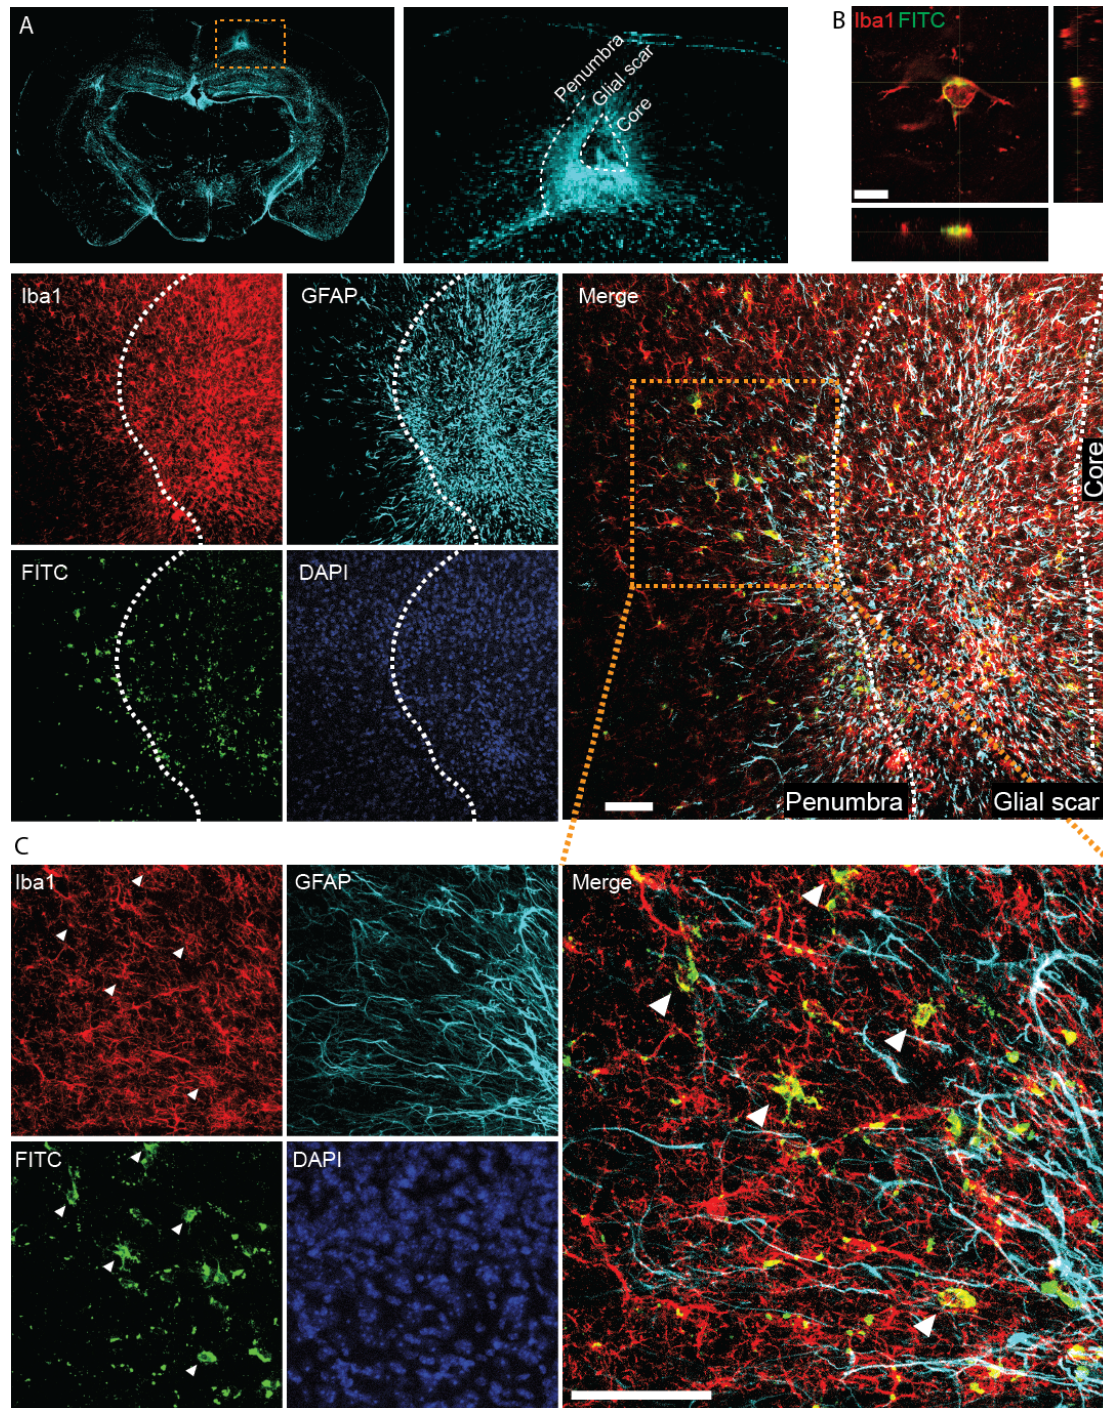

Supplementary Fig S6: **FITC colocalized with IBA1 but not GFAP at the penumbra** (A) Magnification of the glial scar in the infarcted cortex. (B) The FITC-dextran (green) that leaked to the cortex was colocalized with microglia/macrophages (red). there was no double labeling of FITC with astrocytes (cyan) (white arrowheads point to the colocalized cells). White dashed line demonstrates the border between the glial scar and the penumbra. (C) Enlargement of orange dashed box in A. Scale bar: A: 50m, B: 10m, C: 50m.



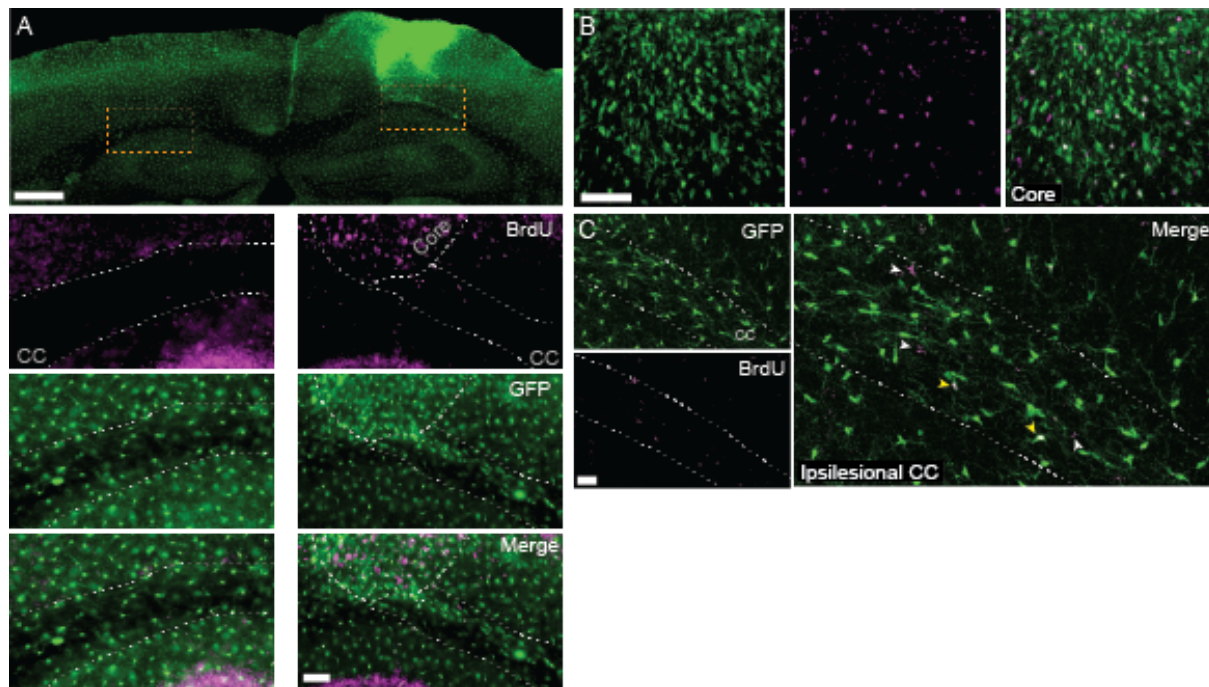

Supplementary Fig S7: **Only a small amount of the GFP+ on the cortex callosum are newly generated microglia/macrophages.** (A) BrdU double labeling for newly formed cells and microglia/macrophages in CX3CR1<sup>GFP/+</sup> mice, in the ipsi- and contra-lesional hemispheres. Only a small number of cells were double labeled for BrdU (magenta) and GFP (green). (B) magnification of the core where many cells are GFP+/BrdU+. (C) magnification of the ipsilesional corpus callosum. white arrowheads point to BrdU labeled cells and yellow arrowhead points to GFP/BrdU double labeled cells. Scale bar: A:1mm, 50m, B:50m, C:100m

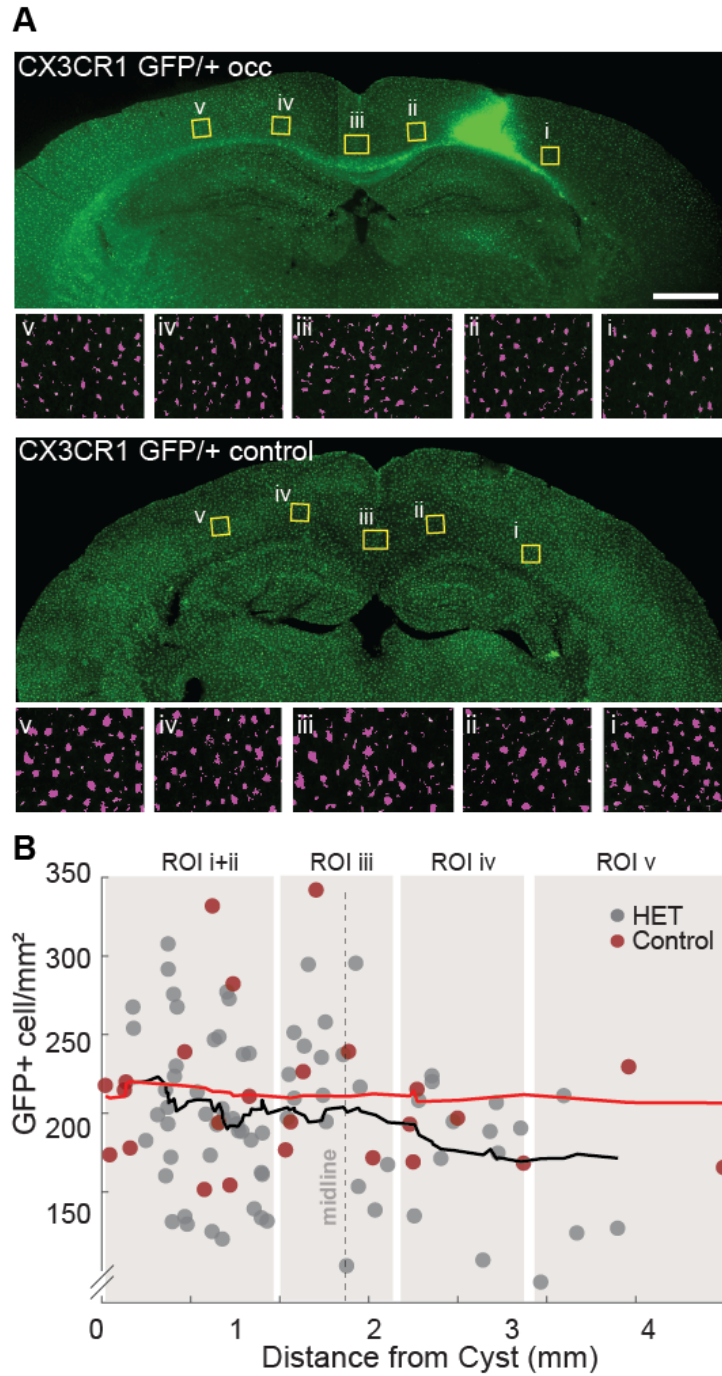

Supplementary Fig S8: **GFP density above the corpus callosum did not change** (A) GFP+ density was measured in 5 ROIs above the corpus callosum of CX3CR1<sup>GFP/+</sup> occluded and control mice, 14 days after micro-occlusion induction. Representative images of automatically identified cells in each ROI are shown below each group (magenta). (B) Mixed-effect general linear model showed no significant effect for any of the model terms but the intercept ( $p < 0.0001$ , DF = 96). Scale bar: 1mm.

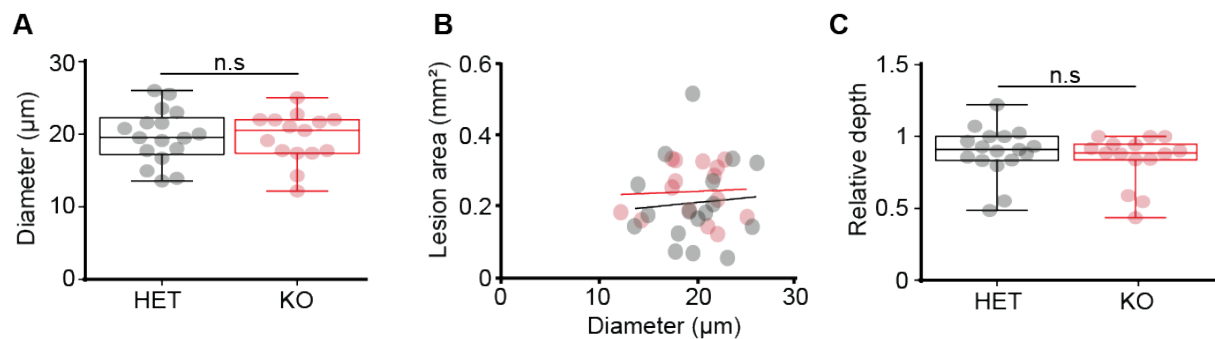

Supplementary Fig S9: **Properties of occluded arteries of CX3CR1 heterozygous and KO mice** (A) The average occluded arteries diameter between the genotypes was similar (19.70.89mm for HET n=17 and 19.510.88 mm for KO;  $p=0.788$ , Students t-test). (B) No correlation between occluded artery diameter and infarct area was found for HET ( $R^2=0.006$ ,  $p=0.755$ , black) and KO ( $R^2=0.002$ ,  $p=0.854$ , red) mice. (C) No difference in infarct depth for both genotypes (0.890.04 for HET n=17 and 0.840.04 for KO;  $p=0.39$ , Students t-test).

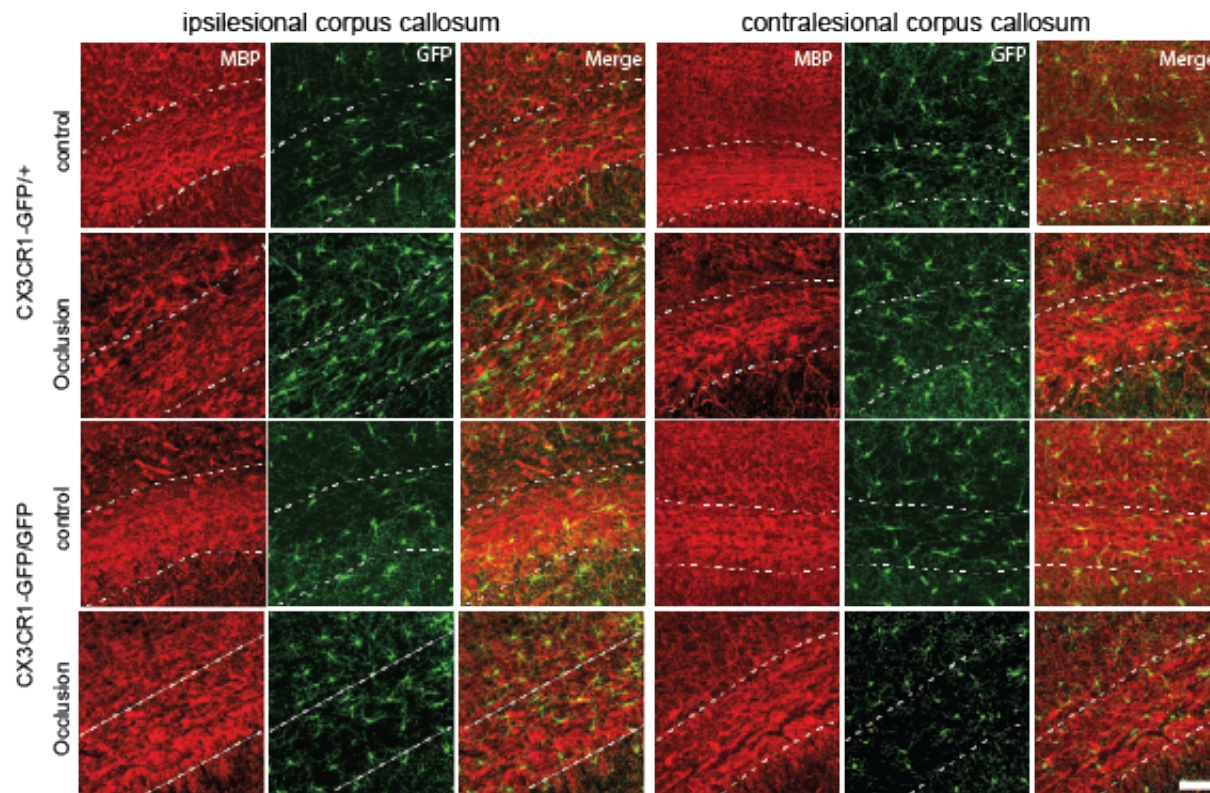

Supplementary Fig S10: Immunofluorescence labeling of myelin basic protein (MBP) in  $CX3CR1^{GFP/+}$  and  $CX3CR1^{GFP/GFP}$  mice 14 days following photothrombotic occlusion. In control animals the myelin appears intact (red) in both genotypes, while following occlusion ipsilesional structural aberrations appeared in the corpus callosum of heterozygous mice along with increase in CX3CR1 density (green). These changes in myelin integrity were milder in KO mice and did not reach the contralateral hemisphere. CX3CR1-positive cells are denser and have ramified morphology with processes extending along the myelin fibers. Scale bar: 100m
